# Supplementary material for: Determination of composition distributions of multi-particle crystalline samples by sequential dissolution with concomitant particle sizing and solution analysis
Source: Royal Society of Chemistry journal article supplement (doi:10.1039/c8ce00206a), 2018-01-01
Supplement: c8ce00206a1.pdf [file c8ce00206a1.pdf]

## Determination of composition distributions of multi-particle crystalline samples by sequential dissolution with concomitant particle sizing and solution analysis

Humphrey A. Moynihan\* and Declan Armstrong

School of Chemistry / Analytical and Biological Chemistry Research Facility / Synthesis and Solid-state Pharmaceutical Centre, University College Cork, College Road, Cork, TY12 YN60, Republic of Ireland.

h.moynihan@ucc.ie

### SUPPLEMENTARY INFORMATION

#### Contents

**Synthesis of *N*-(2-nitro-4-trifluoromethylphenyl)pivalamide (4):** page 4

**Figure S1.** <sup>1</sup>H NMR spectrum of *N*-(2-nitro-4-trifluoromethylphenyl)pivalamide (4): page 5

**Figure S2.** <sup>13</sup>C NMR {<sup>1</sup>H} spectrum of *N*-(2-nitro-4-trifluoromethylphenyl)pivalamide (4): page 5

**Figure S3.** <sup>19</sup>F NMR {<sup>1</sup>H} spectrum of *N*-(2-nitro-4-trifluoromethylphenyl)pivalamide (4): page 6

**HPLC Calibration Data:** pages 7 - 9

**Figure S4.** TGA curve overlaid the DSC curve for **1** doped with 8 mol % of **4**: page 10

**Figure S5.** Chart comparing particle area versus the ranking of each particle in a partial dissolution series of **1** doped with 0.5 mol % of **2**: page 10

**Figure S6.** Chart comparing particle length versus the ranking of each particle in a partial dissolution series of **1** doped with 0.5 mol % of **2**: page 11

**Figure S7.** Chart comparing particle area versus the ranking of each particle in a partial dissolution series of **1** doped with 1.0 mol % of **2**: page 11

**Figure S8.** Chart comparing particle length versus the ranking of each particle in a partial dissolution series of **1** doped with 1.0 mol % of **2**: page 12

**Figure S9.** Chart comparing particle length versus the ranking of each particle in a partial dissolution series of **1** doped with 1.5 mol % of **2**: page 12

**Figure S10.** Chart comparing particle area versus the ranking of each particle in a partial dissolution series of **1** doped with 2.0 mol % of **2**: page 13

**Figure S11.** Chart comparing particle length versus the ranking of each particle in a partial dissolution series of **1** doped with 2.0 mol % of **2**: page 13

**Figure S12.** Chart comparing particle area versus the ranking of each particle in a partial dissolution series of **1** doped with 2.5 mol % of **2**: page 14

**Figure S13.** Chart comparing particle length versus the ranking of each particle in a partial dissolution series of **1** doped with 2.5 mol % of **2**: page 13

**Figure S14.** Chart comparing particle area versus the ranking of each particle in a partial dissolution series of **1** doped with 3.0 mol % of **2**: page 15

**Figure S15.** Chart comparing particle length versus the ranking of each particle in a partial dissolution series of **1** doped with 3.0 mol % of **2**: page 15

**Figure S16.** Chart comparing particle area versus the ranking of each particle in a partial dissolution series of **1** doped with 0.5 mol % of **3**: page 16

**Figure S17.** Chart comparing particle length versus the ranking of each particle in a partial dissolution series of **1** doped with 0.5 mol % of **3**: page 16

**Figure S18.** Chart comparing particle area versus the ranking of each particle in a partial dissolution series of **1** doped with 1.0 mol % of **3**: page 17

**Figure S19.** Chart comparing particle length versus the ranking of each particle in a partial dissolution series of **1** doped with 1.0 mol % of **3**: page 17

**Figure S20.** Chart comparing particle area versus the ranking of each particle in a partial dissolution series of **1** doped with 1.5 mol % of **3**: page 18

**Figure S21.** Chart comparing particle length versus the ranking of each particle in a partial dissolution series of **1** doped with 1.5 mol % of **3**: page 18

**Figure S22.** Chart comparing particle area versus the ranking of each particle in a partial dissolution series of **1** doped with 2.0 mol % of **3**: page 19

**Figure S23.** Chart comparing particle length versus the ranking of each particle in a partial dissolution series of **1** doped with 2.0 mol % of **3**: page 19

**Figure S24.** Chart comparing particle length versus the ranking of each particle in a partial dissolution series of **1** doped with 2.5 mol % of **3**: page 20

**Figure S25.** Chart comparing particle area versus the ranking of each particle in a partial dissolution series of **1** doped with 3.0 mol % of **3**. Page 20

**Figure S26.** Chart comparing particle length versus the ranking of each particle in a partial dissolution series of **1** doped with 3.0 mol % of **3**: page 21

**Figure S27.** Plot of percentage by HPLC of added impurity in crystals of compound **1** vs. the dissolution mid-point for the sample of crystals grown from solutions containing 0.5 mol % of additive **2**: page 21

**Figure S28.** Plot of percentage by HPLC of added impurity in crystals of compound **1** vs. the dissolution mid-point for the sample of crystals grown from solutions containing 1.0 mol % of additive **2**: page 22

**Figure S29.** Plot of percentage by HPLC of added impurity in crystals of compound **1** vs. the dissolution mid-point for the sample of crystals grown from solutions containing 2.0 mol % of additive **2**: page 22

**Figure S30.** Plot of percentage by HPLC of added impurity in crystals of compound **1** vs. the dissolution mid-point for the sample of crystals grown from solutions containing 2.5 mol % of additive **2**: page 23

**Figure S31.** Plot of percentage by HPLC of added impurity in crystals of compound **1** vs. the dissolution mid-point for the sample of crystals grown from solutions containing 3.0 mol % of additive **2**: page 23

**Figure S32.** Plot of percentage by HPLC of added impurity in crystals of compound **1** vs. the dissolution mid-point for the sample of crystals grown from solutions containing 0.5 mol % of additive **3**: page 24

**Figure S33.** Plot of percentage by HPLC of added impurity in crystals of compound **1** vs. the dissolution mid-point for the sample of crystals grown from solutions containing 1.0 mol % of additive **3**: page 24

**Figure S34.** Plot of percentage by HPLC of added impurity in crystals of compound **1** vs. the dissolution mid-point for the sample of crystals grown from solutions containing 1.5 mol % of additive **3**: page 25

**Figure S35.** Plot of percentage by HPLC of added impurity in crystals of compound **1** vs. the dissolution mid-point for the sample of crystals grown from solutions containing 2.0 mol % of additive **3**: page 25

**Figure S36.** Plot of percentage by HPLC of added impurity in crystals of compound **1** vs. the dissolution mid-point for the sample of crystals grown from solutions containing 3.0 mol % of additive **3**: page 26

**Figure S37.** Plot of percentage by HPLC of added impurity in a single crystal of compound **1**, grown from solutions containing 3.0 mol % of additive **3**, vs. the dissolution mid-point for the crystal: page 27

## Synthesis of *N*-(2-nitro-4-trifluoromethylphenyl)pivalamide **4**

*N*-(2-nitro-4-trifluoromethylphenyl)pivalamide **4** was prepared by heating a mixture of 2-nitro-4-trifluoromethylaniline (1.0 g, 4.852 mmol), trimethylacetic anhydride (1.5 mL, 7.390 mmol), and two drops of sulphuric acid to 80 °C for 3 hours. The resulting solution was allowed to cool to room temperature with the formation of yellow plate-like crystals. Water (10 mL) was added to the reaction mixture, and with manual stirring further solid precipitated out of solution. The crude product was isolated by vacuum filtration, washed with two 10 mL portions of water and air dried. The crude product was purified by recrystallization with 20 mL of ethanol, isolated by vacuum filtration, washed with a further 10 mL of ice-cold ethanol and air dried. Yield 0.462 g (33 %) of a yellow crystalline solid. M.p. 92 - 94 °C. <sup>1</sup>H NMR (300 MHz, CDCl<sub>3</sub>): δ 10.89 (1H, s, NH), 9.05 (1H, d, <sup>3</sup>J<sub>HH</sub> = 9 Hz, H6), 8.52 (1H, d, <sup>4</sup>J<sub>HH</sub> = 2 Hz, H3), 7.87 (1H, dd, <sup>3</sup>J<sub>HH</sub> = 9, <sup>4</sup>J<sub>HH</sub> = 2 Hz, H5), 1.37 (s, 9H, 3 × CH<sub>3</sub>) ppm; <sup>13</sup>C {<sup>1</sup>H} NMR (DEPTQ-135) (75 MHz, CDCl<sub>3</sub>): δ 178.17 (s, C=O), 138.37 (s, C1), 135.54 (s, C2), 132.43 (q, <sup>3</sup>J<sub>CF</sub> = 3.3 Hz, C5), 124.86 (q, <sup>2</sup>J<sub>CF</sub> = 34.6 Hz, C4), 123.77 (q, <sup>1</sup>J<sub>CF</sub> = 272.1 Hz, CF<sub>3</sub>), 123.51 (q, <sup>3</sup>J<sub>CF</sub> = 4.1 Hz, C3), 122.67 (s, C6), 40.91 (s, C(CH<sub>3</sub>)<sub>3</sub>), 27.43 (s, 3 × CH<sub>3</sub>) ppm; <sup>19</sup>F {<sup>1</sup>H} NMR (282 MHz, CDCl<sub>3</sub>): δ -62.65 (s, CF<sub>3</sub>) ppm. ESI-MS (CH<sub>3</sub>CN): 291.2 positive mode [M + H<sup>+</sup>, calc. 291.10 for C<sub>12</sub>H<sub>14</sub>N<sub>2</sub>F<sub>3</sub>O<sub>3</sub>]; 292.2 positive mode [M + H<sup>+</sup> + 1, calc. 292.10 for C<sub>12</sub>H<sub>14</sub>N<sub>2</sub>F<sub>3</sub>O<sub>3</sub>]; 289.2 negative mode [M - H, calc. 289.08 for C<sub>12</sub>H<sub>12</sub>N<sub>2</sub>F<sub>3</sub>O<sub>3</sub>]; 290.3 negative mode [M - H + 1, calc. 290.09 for C<sub>12</sub>H<sub>12</sub>N<sub>2</sub>F<sub>3</sub>O<sub>3</sub>] R<sub>f</sub> (1:7 ethyl acetate:hexane on silica gel) = 0.55.

[<sup>1</sup>H (300 MHz), <sup>13</sup>C {<sup>1</sup>H} (75 MHz), and <sup>19</sup>F {<sup>1</sup>H} NMR (282 MHz) spectra were recorded on a Bruker Avance 300 MHz NMR spectrometer. Low resolution mass spectra were recorded on a Waters Quattro Micro triple quadrupole instrument in electrospray ionization (ESI) mode using 50% acetonitrile-water containing 0.1% formic acid as eluent; samples were prepared in acetonitrile.]

## NMR

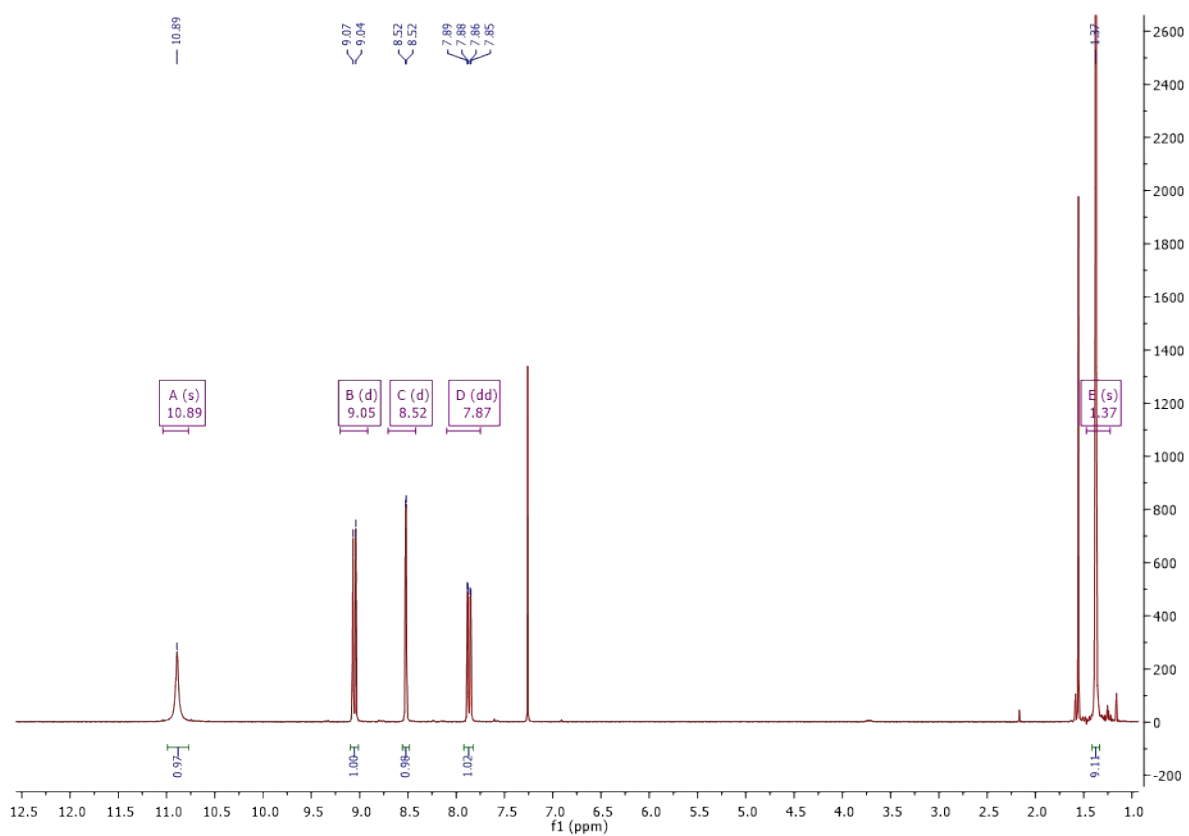

**Figure S1.**  $^1\text{H}$  NMR spectrum of **4** in  $\text{CDCl}_3$ .

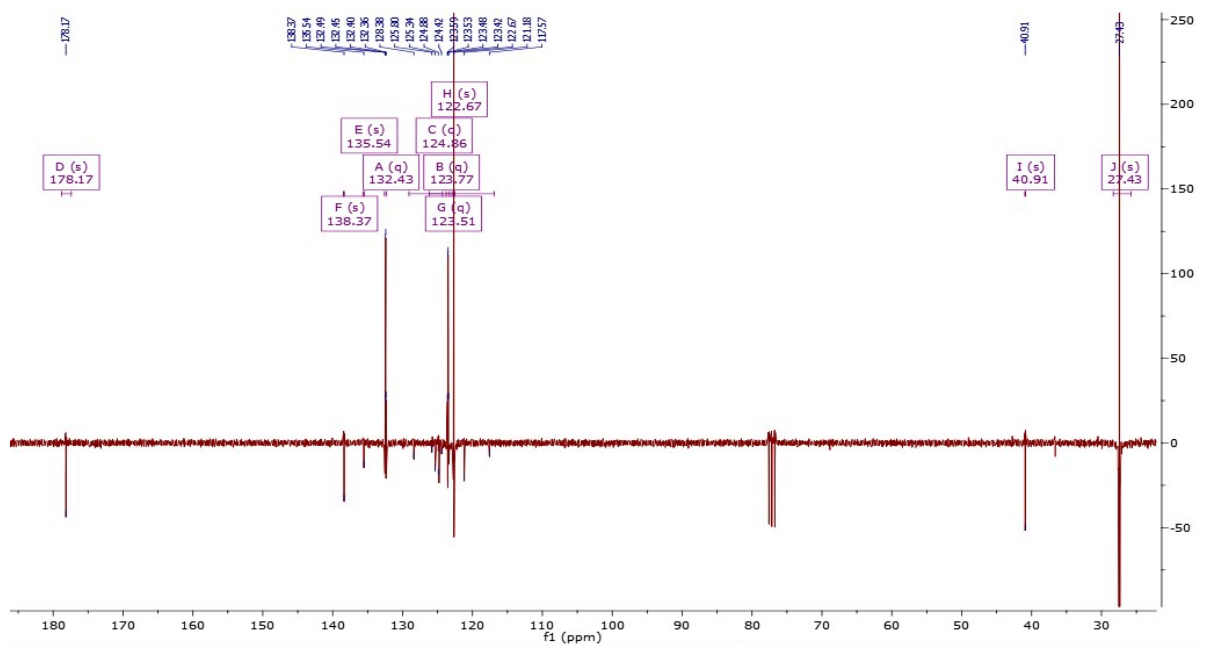

**Figure S2.**  $^{13}\text{C}$  NMR  $\{^1\text{H}\}$  (DEPTQ-135) spectrum of **4** in  $\text{CDCl}_3$ . CH and  $\text{CH}_3$  signals are positive, all other signals are negative.

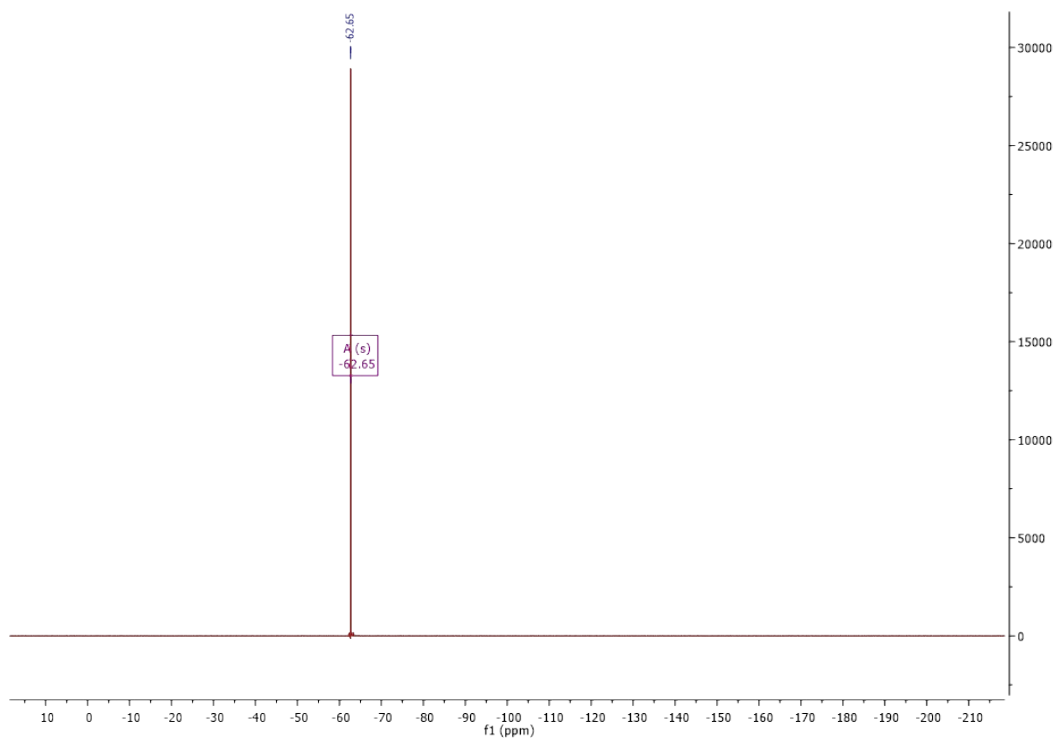

**Figure S3.**  $^{19}\text{F}$  NMR  $\{^1\text{H}\}$  spectrum of **4** in  $\text{CDCl}_3$ .

## HPLC Calibration Data

### General Calibration Setting

```

-----
Calib. Data Modified   :    21-Jun-17 12:24:13 PM
Signals calculated separately :    No
Rel. Reference Window  :    5.000 %
Abs. Reference Window  :    0.000 min
Rel. Non-ref. Window   :    5.000 %

Abs. Non-ref. Window   :    0.000 min
Uncalibrated Peaks     :    not reported
Partial Calibration     :    Yes, identified peaks are recalibrated
Correct All Ret. Times :    No, only for identified peaks
Curve Type              :    Linear
Origin                  :    Forced
Weight                  :    Equal
Recalibration Settings:
Average Response        :    Average all calibrations
Average Retention Time :    Floating Average New 75%
-----
  
```

### Signal Details

```

-----
Signal 1: DAD1 A, Sig=234,4 Ref=360,100
-----
  
```

### Overview Table

```

-----
      RT Sig Lvl  Amount      Area  Rsp.Factor Ref ISTD #  Compound
      |  |  |  |  |  |  |  |  |  |  |  |  |  |  |  |  |  |  |  |  |  |  |
      |  |  |  |  |  |  |  |  |  |  |  |  |  |  |  |  |  |  |  |  |  |  |
-----|---|---|-----|-----|-----|---|---|-----|-----|
  
```

| RT     | Sig | Lvl | Amount [ng/ul] | Area       | Rsp.Factor | Ref | ISTD | #        | Compound |
|--------|-----|-----|----------------|------------|------------|-----|------|----------|----------|
| 5.059  | 1   | 1   | 1.03000        | 47.69269   | 2.15966e-2 | No  | No   | <b>2</b> |          |
|        |     | 2   | 2.57500        | 120.68970  | 2.13357e-2 |     |      |          |          |
|        |     | 3   | 5.15000        | 246.91501  | 2.08574e-2 |     |      |          |          |
|        |     | 4   | 10.30000       | 497.15610  | 2.07178e-2 |     |      |          |          |
|        |     | 5   | 25.75000       | 1238.43115 | 2.07924e-2 |     |      |          |          |
|        |     | 6   | 51.50000       | 2416.96289 | 2.13077e-2 |     |      |          |          |
|        |     | 7   | 103.00000      | 4937.32324 | 2.08615e-2 |     |      |          |          |
| 6.990  | 1   | 1   | 9.80000e-1     | 50.16642   | 1.95350e-2 | No  | No   | <b>3</b> |          |
|        |     | 2   | 2.45000        | 125.26588  | 1.95584e-2 |     |      |          |          |
|        |     | 3   | 4.90000        | 257.21909  | 1.90499e-2 |     |      |          |          |
|        |     | 4   | 9.80000        | 518.87018  | 1.88872e-2 |     |      |          |          |
|        |     | 5   | 24.50000       | 1292.15259 | 1.89606e-2 |     |      |          |          |
|        |     | 6   | 49.00000       | 2516.06958 | 1.94748e-2 |     |      |          |          |
|        |     | 7   | 98.00000       | 5164.98242 | 1.89739e-2 |     |      |          |          |
| 12.732 | 1   | 1   | 1.02000        | 48.12077   | 2.11967e-2 | No  | No   | <b>1</b> |          |
|        |     | 2   | 2.55000        | 113.33391  | 2.24999e-2 |     |      |          |          |
|        |     | 3   | 5.10000        | 230.78233  | 2.20987e-2 |     |      |          |          |
|        |     | 4   | 10.20000       | 465.83960  | 2.18959e-2 |     |      |          |          |
|        |     | 5   | 25.50000       | 1158.93127 | 2.20030e-2 |     |      |          |          |
|        |     | 6   | 51.00000       | 2261.68774 | 2.25495e-2 |     |      |          |          |
|        |     | 7   | 102.00000      | 4634.19922 | 2.20103e-2 |     |      |          |          |
| 23.282 | 1   | 1   | 1.02000        | 34.24325   | 2.97869e-2 | No  | No   | <b>4</b> |          |
|        |     | 2   | 2.55000        | 86.07143   | 2.96266e-2 |     |      |          |          |
|        |     | 3   | 5.10000        | 175.30609  | 2.90920e-2 |     |      |          |          |
|        |     | 4   | 10.20000       | 354.45395  | 2.87767e-2 |     |      |          |          |
|        |     | 5   | 25.50000       | 883.34070  | 2.88677e-2 |     |      |          |          |

6 51.00000 1717.42346 2.96956e-2  
 7 102.00000 3517.49609 2.89979e-2

=====  
 =====  
 Calibration Curves  
 =====

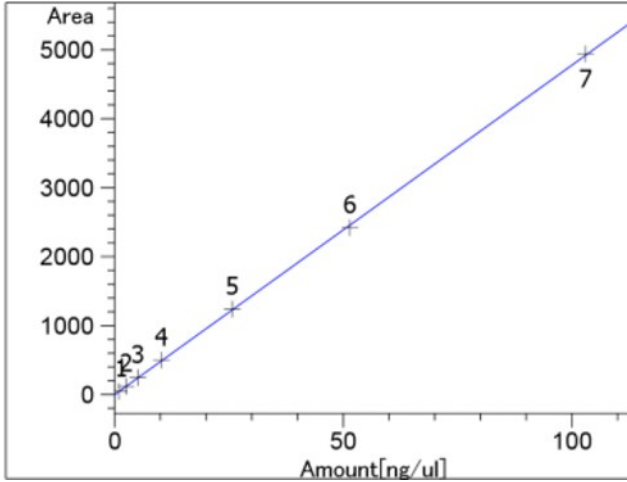

2 at exp. RT: 5.070  
 DAD1 A, Sig=234,4 Ref=360,100  
 Correlation: 0.99996  
 Residual Std. Dev.: 19.39276  
 Formula:  $y = mx$   
 m: 47.75528  
 x: Amount[ng/ul]  
 y: Area

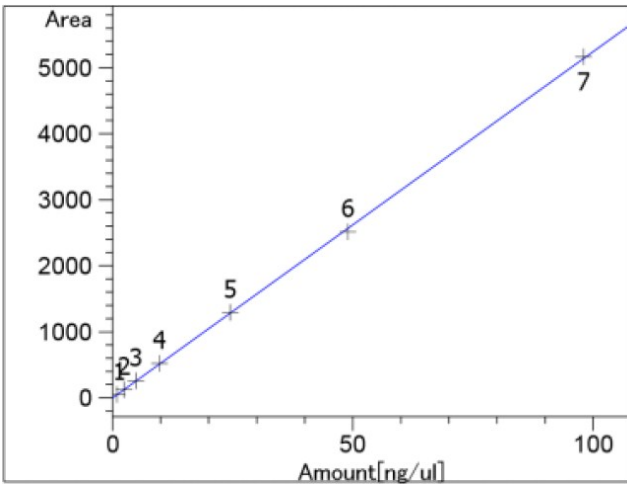

3 at exp. RT: 7.003  
 DAD1 A, Sig=234,4 Ref=360,100  
 Correlation: 0.99995  
 Residual Std. Dev.: 24.56110  
 Formula:  $y = mx$   
 m: 52.45060  
 x: Amount[ng/ul]  
 y: Area

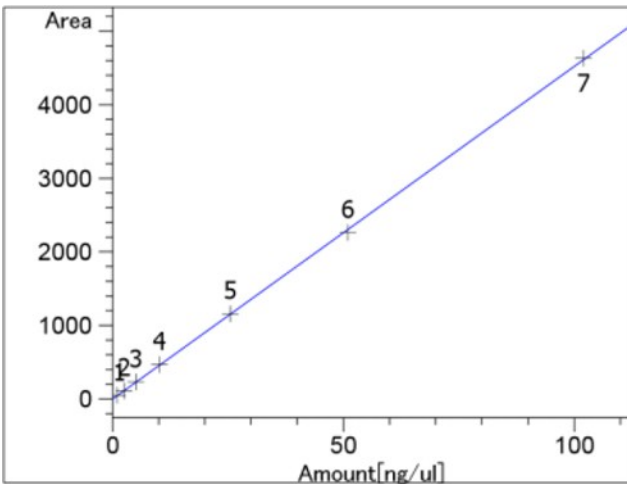

1 at exp. RT: 12.745  
 DAD1 A, Sig=234,4 Ref=360,100  
 Correlation: 0.99996  
 Residual Std. Dev.: 20.48602  
 Formula:  $y = mx$   
 m: 45.23025  
 x: Amount[ng/ul]  
 y: Area



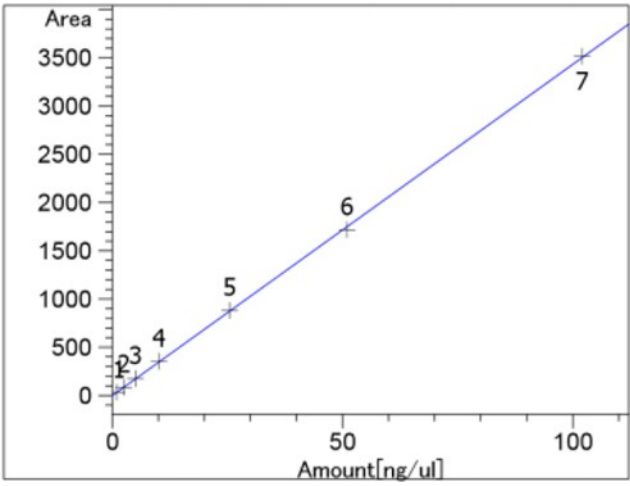

4 at exp. RT: 23.275  
DAD1 A, Sig=234,4 Ref=360,100  
Correlation: 0.99996  
Residual Std. Dev.: 15.54065  
Formula:  $y = mx$   
m: 34.34116  
x: Amount [ng/ul]  
y: Area

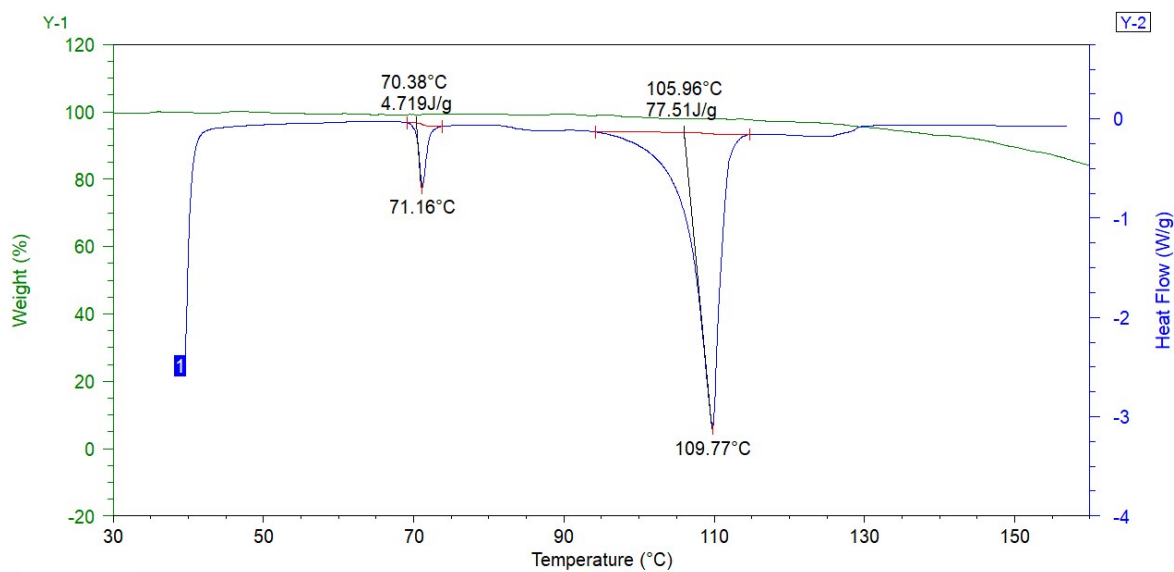

**Figure S4.** TGA curve overlaid the DSC curve for **1** doped with 8 mol % of **4**.

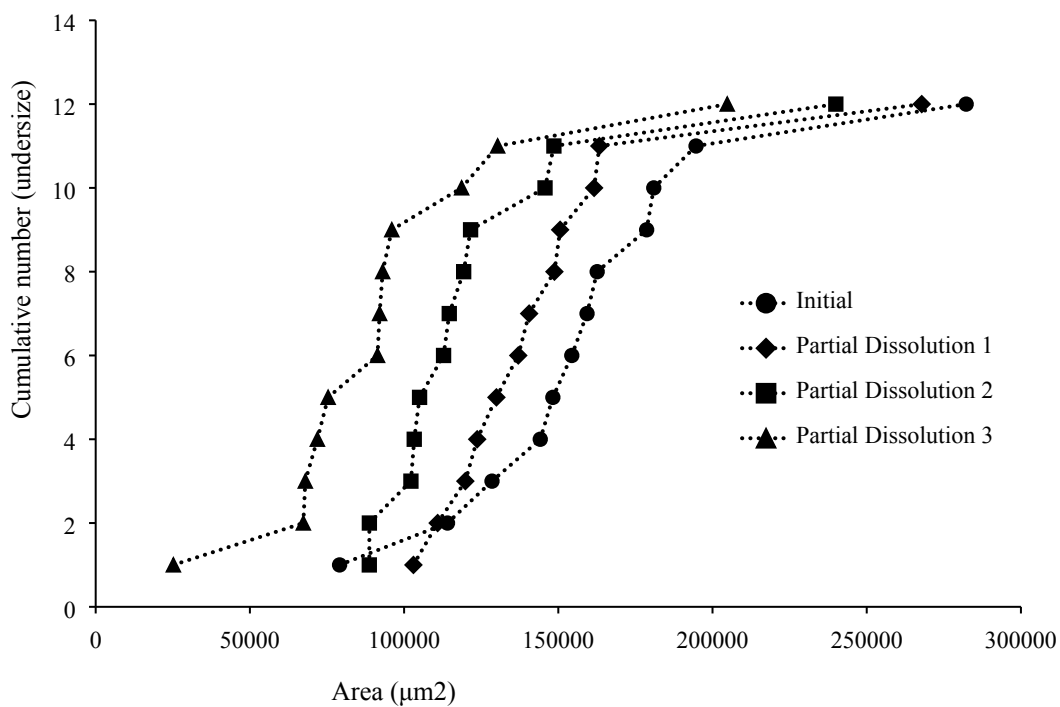

**Figure S5.** Chart comparing particle area versus the ranking of each particle in a partial dissolution series of **1** doped with 0.5 mol % of **2**.

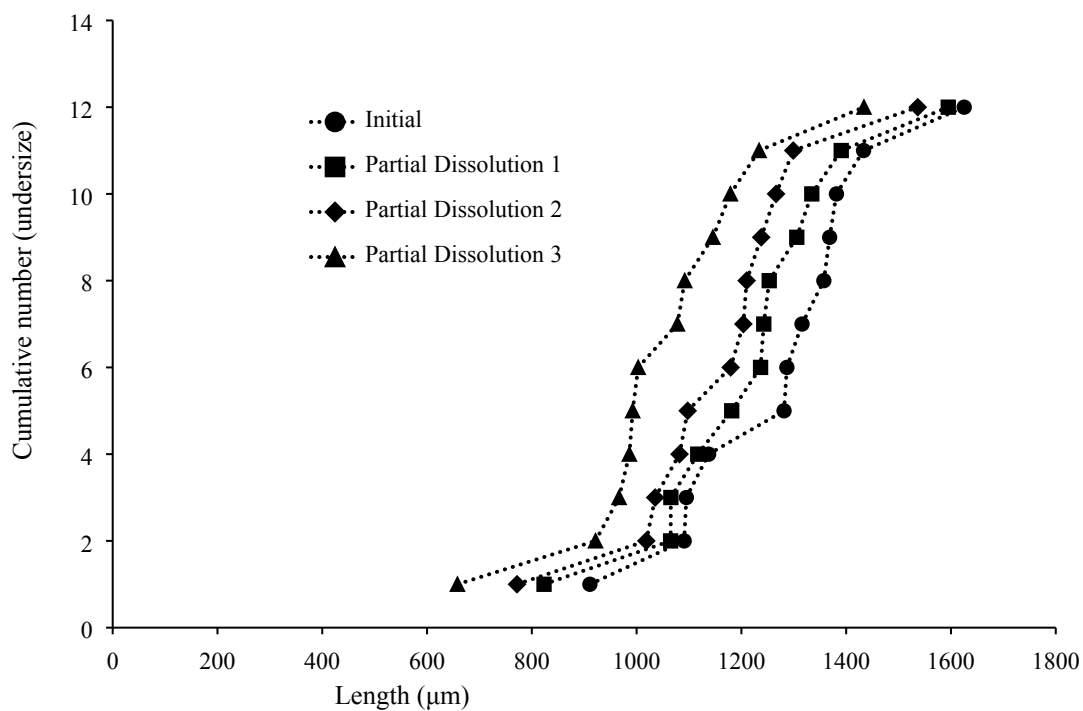

**Figure S6.** Chart comparing particle length versus the ranking of each particle in a partial dissolution series of 1 doped with 0.5 mol % of 2.

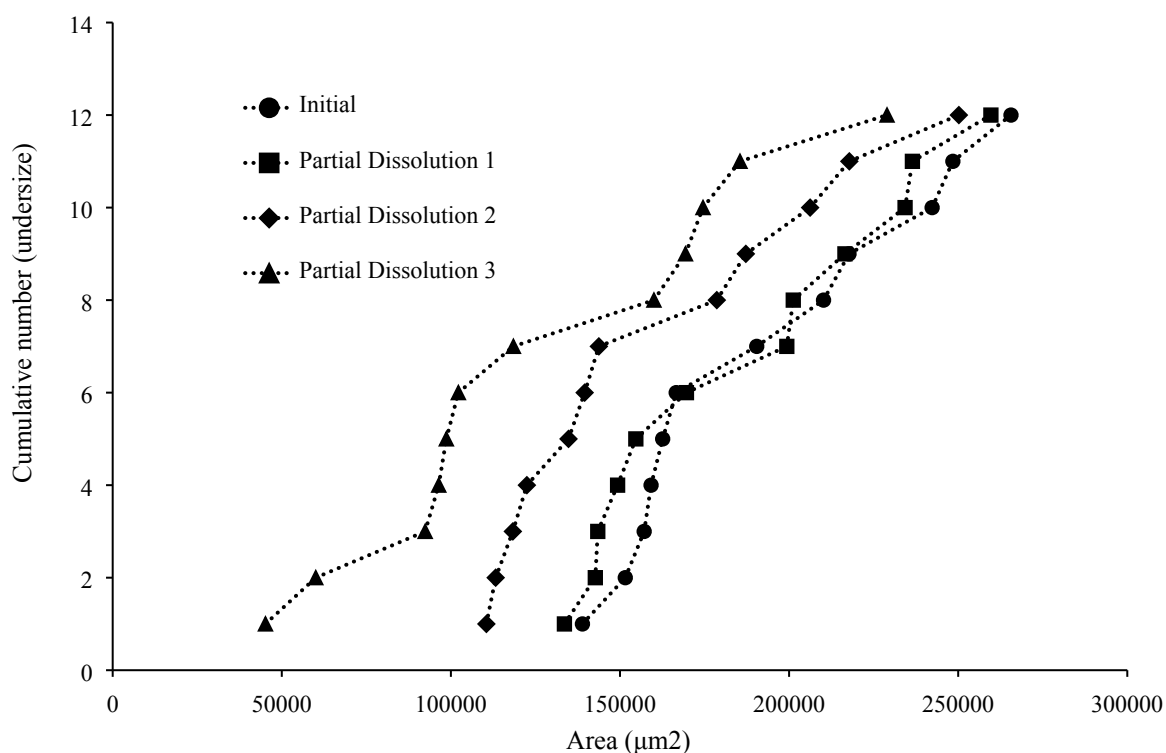

**Figure S7.** Chart comparing particle area versus the ranking of each particle in a partial dissolution series of 1 doped with 1.0 mol % of 2.

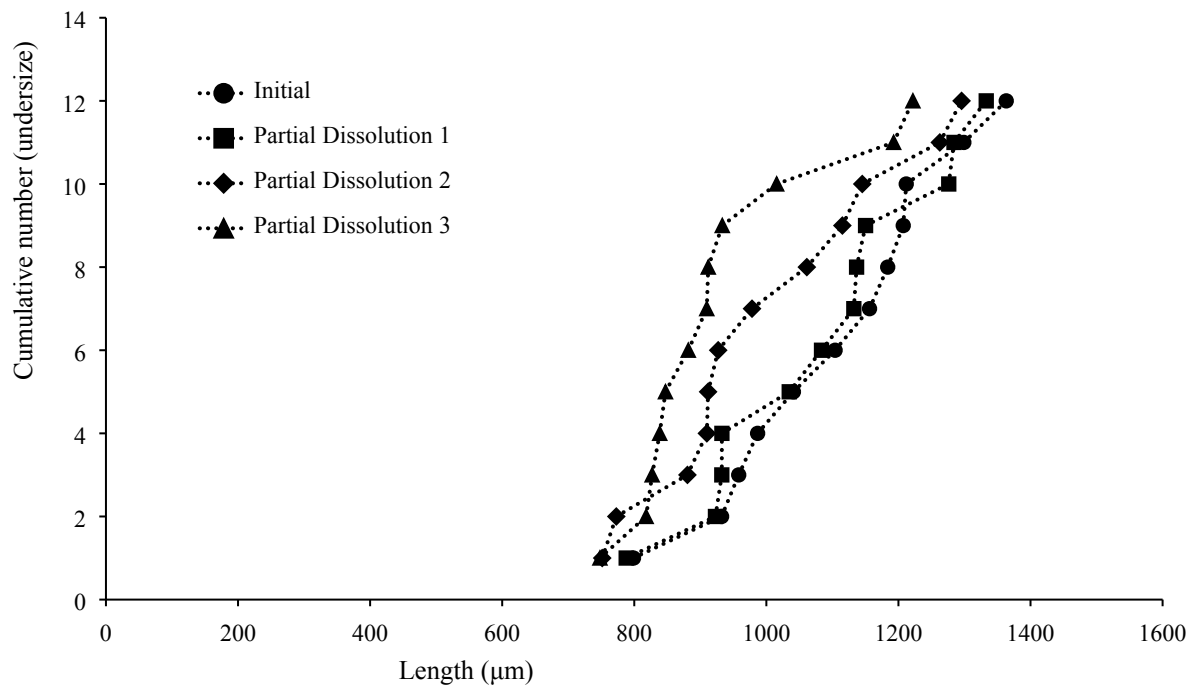

**Figure S8.** Chart comparing particle length versus the ranking of each particle in a partial dissolution series of **1** doped with 1.0 mol % of **2**.

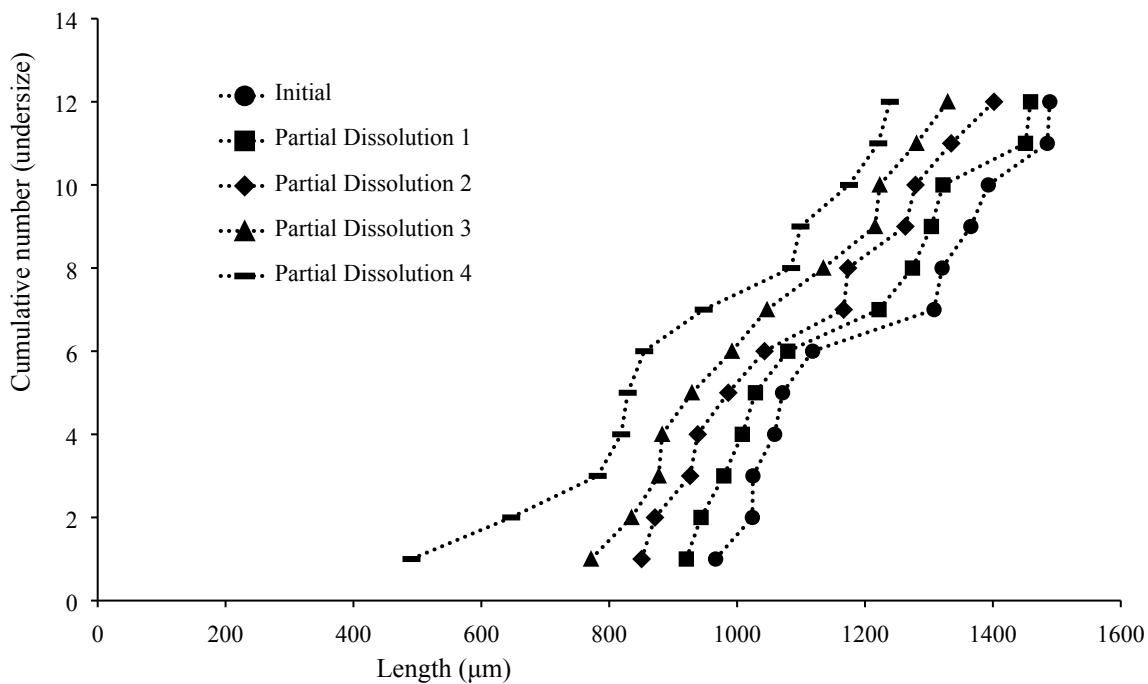

**Figure S9.** Chart comparing particle length versus the ranking of each particle in a partial dissolution series of **1** doped with 1.5 mol % of **2**.

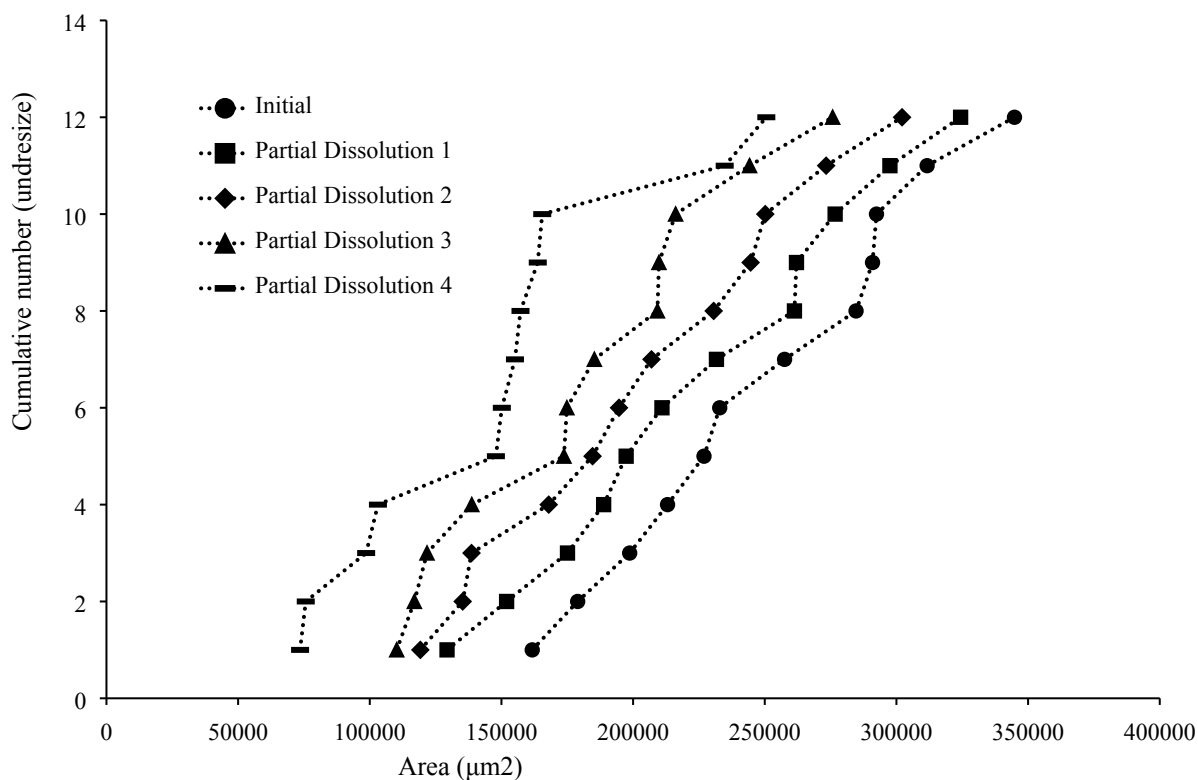

**Figure S10.** Chart comparing particle area versus the ranking of each particle in a partial dissolution series of 1 doped with 2.0 mol % of 2.

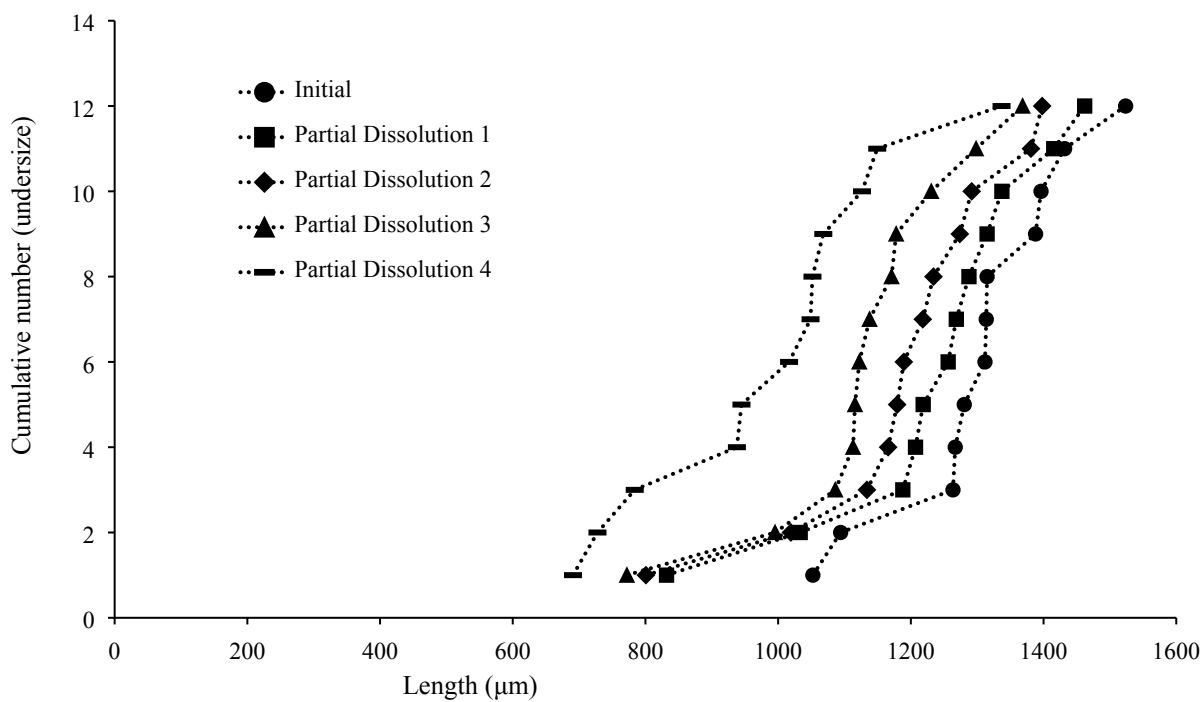

**Figure S11.** Chart comparing particle length versus the ranking of each particle in a partial dissolution series of 1 doped with 2.0 mol % of 2.

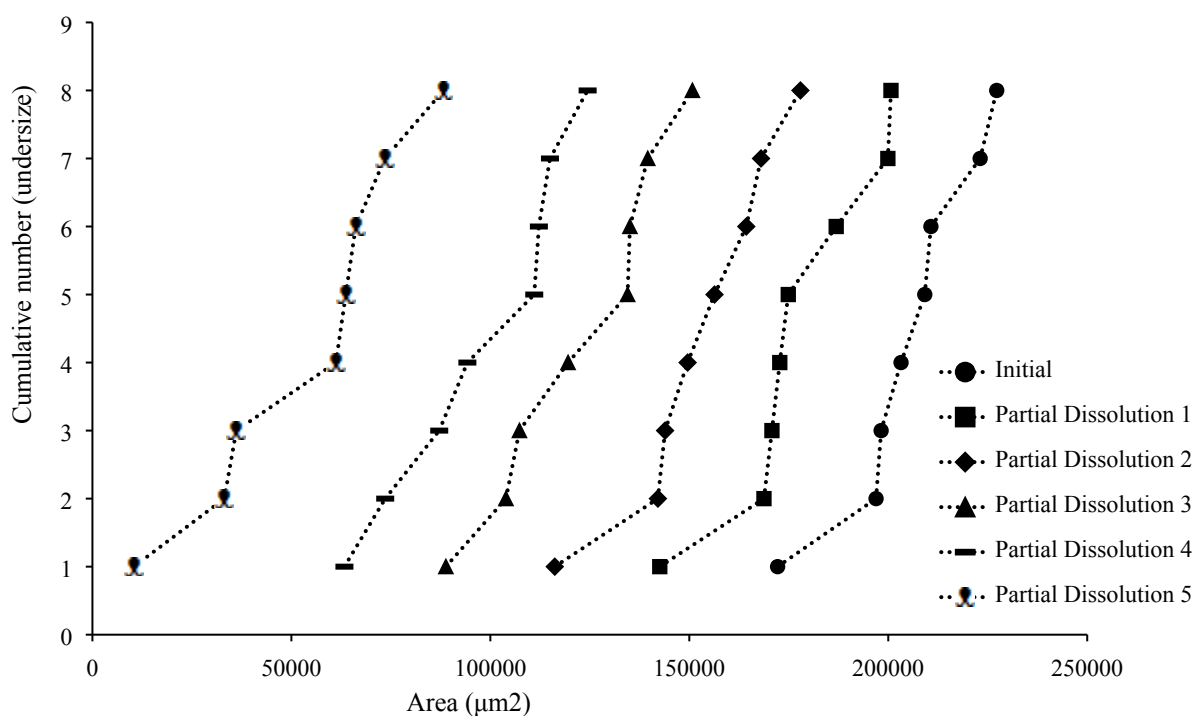

**Figure S12.** Chart comparing particle area versus the ranking of each particle in a partial dissolution series of **1** doped with 2.5 mol % of **2**.

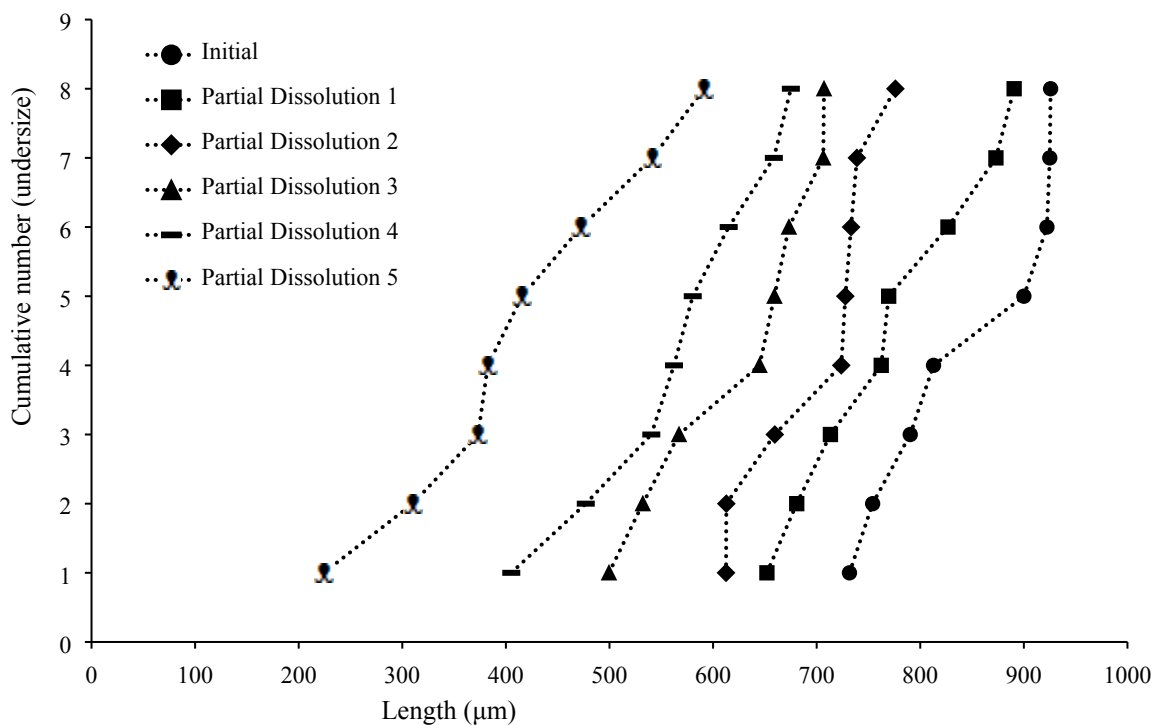

**Figure S13.** Chart comparing particle length versus the ranking of each particle in a partial dissolution series of **1** doped with 2.5 mol % of **2**.

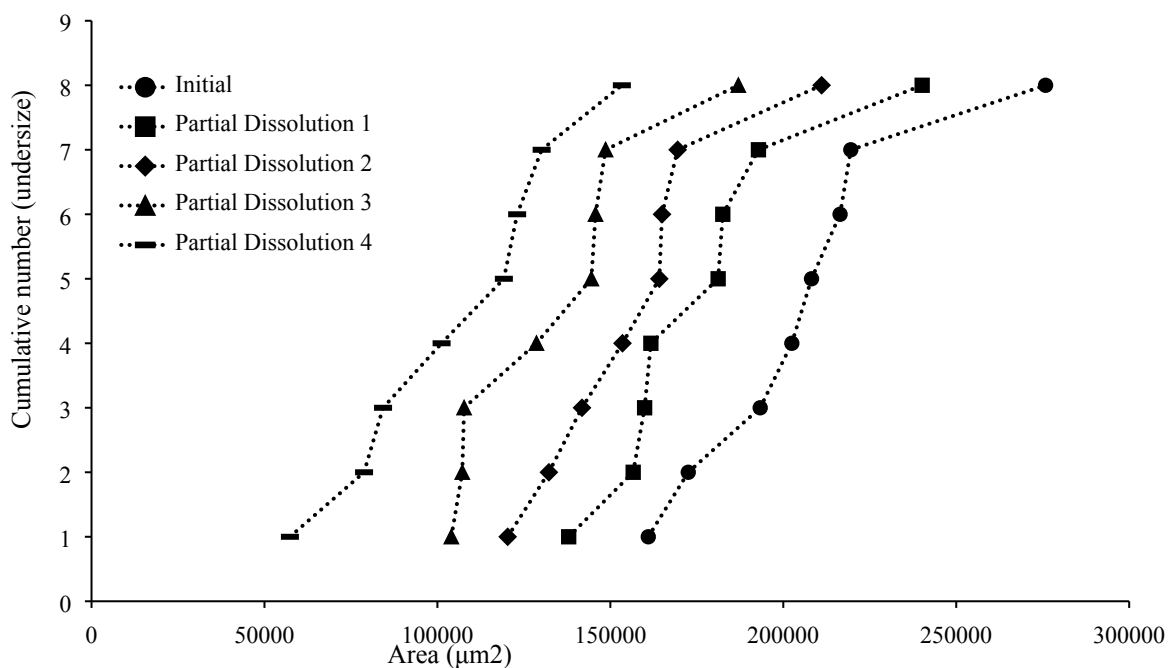

**Figure S14.** Chart comparing particle area versus the ranking of each particle in a partial dissolution series of **1** doped with 3.0 mol % of **2**.

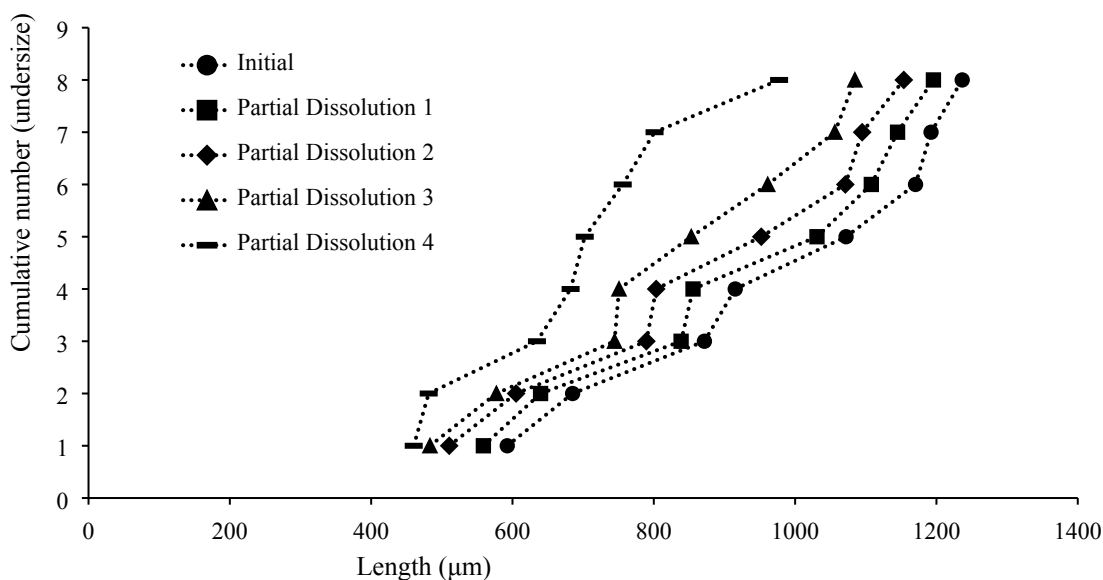

**Figure S15.** Chart comparing particle length versus the ranking of each particle in a partial dissolution series of **1** doped with 3.0 mol % of **2**.

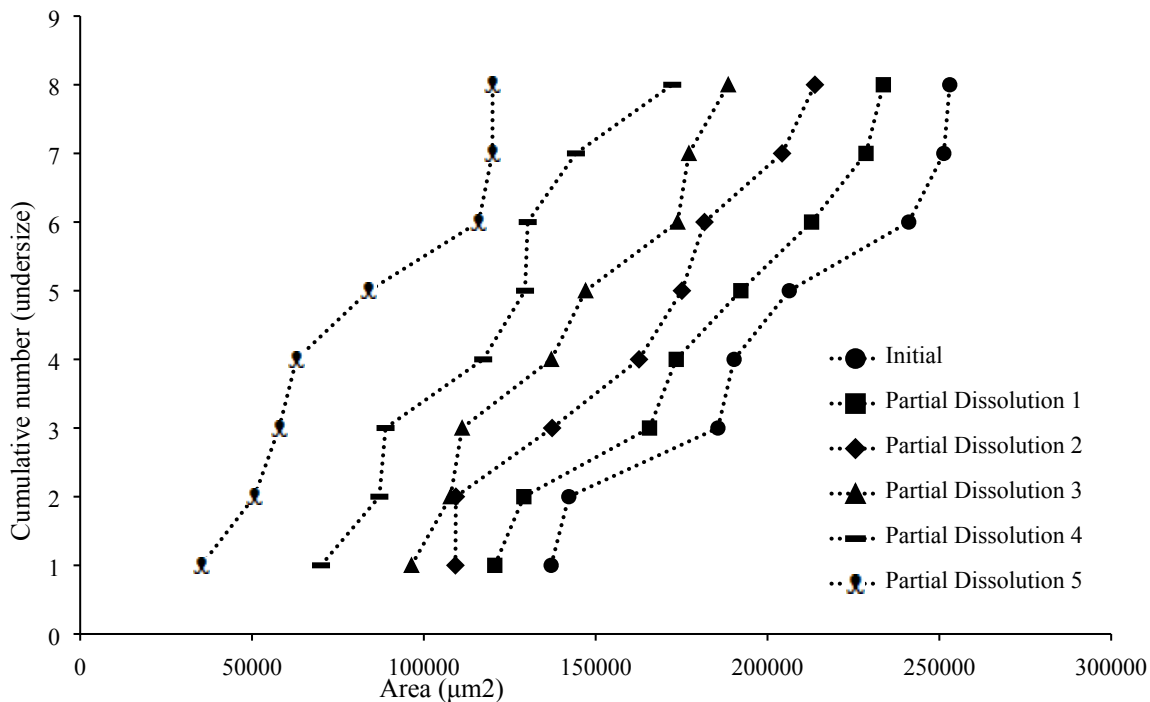

**Figure S16.** Chart comparing particle area versus the ranking of each particle in a partial dissolution series of **1** doped with 0.5 mol % of **3**.

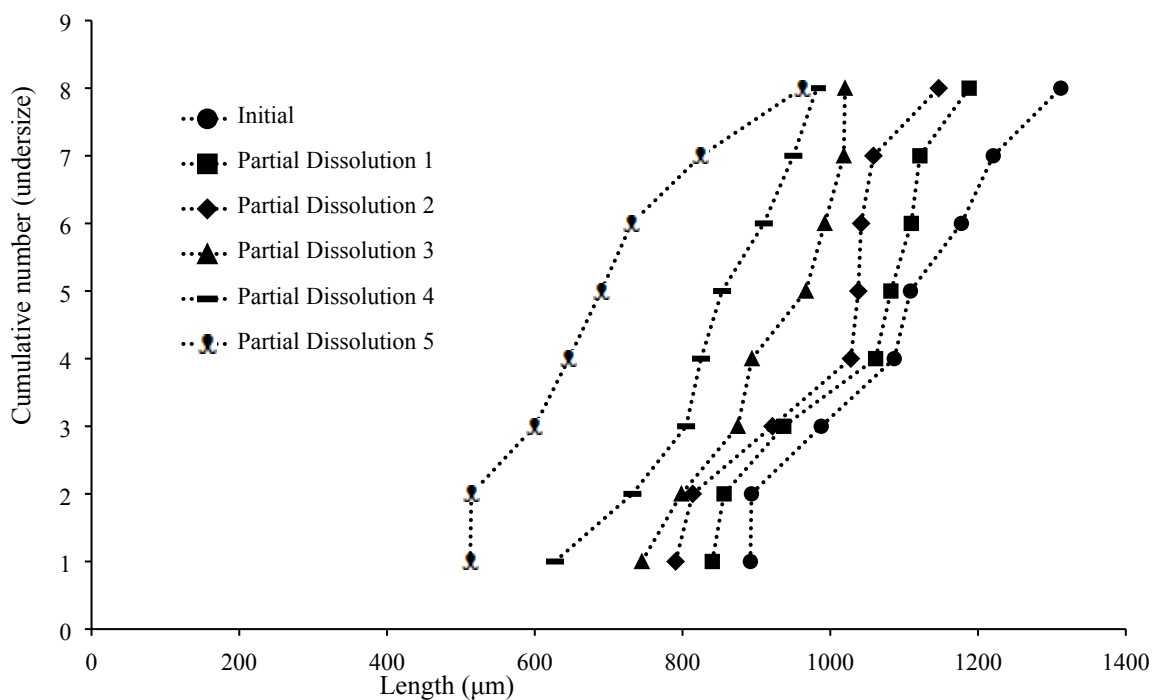

**Figure S17.** Chart comparing particle length versus the ranking of each particle in a partial dissolution series of **1** doped with 0.5 mol % of **3**.



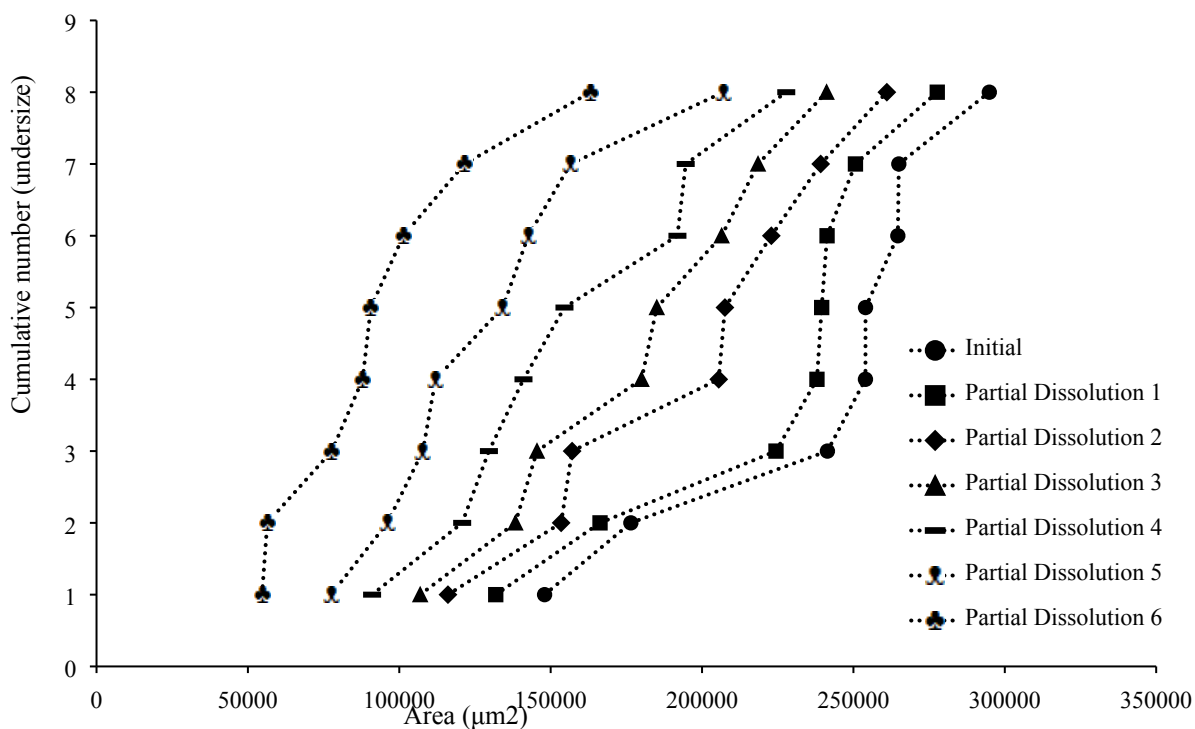

**Figure S18.** Chart comparing particle area versus the ranking of each particle in a partial dissolution series of 1 doped with 1.0 mol % of 3.

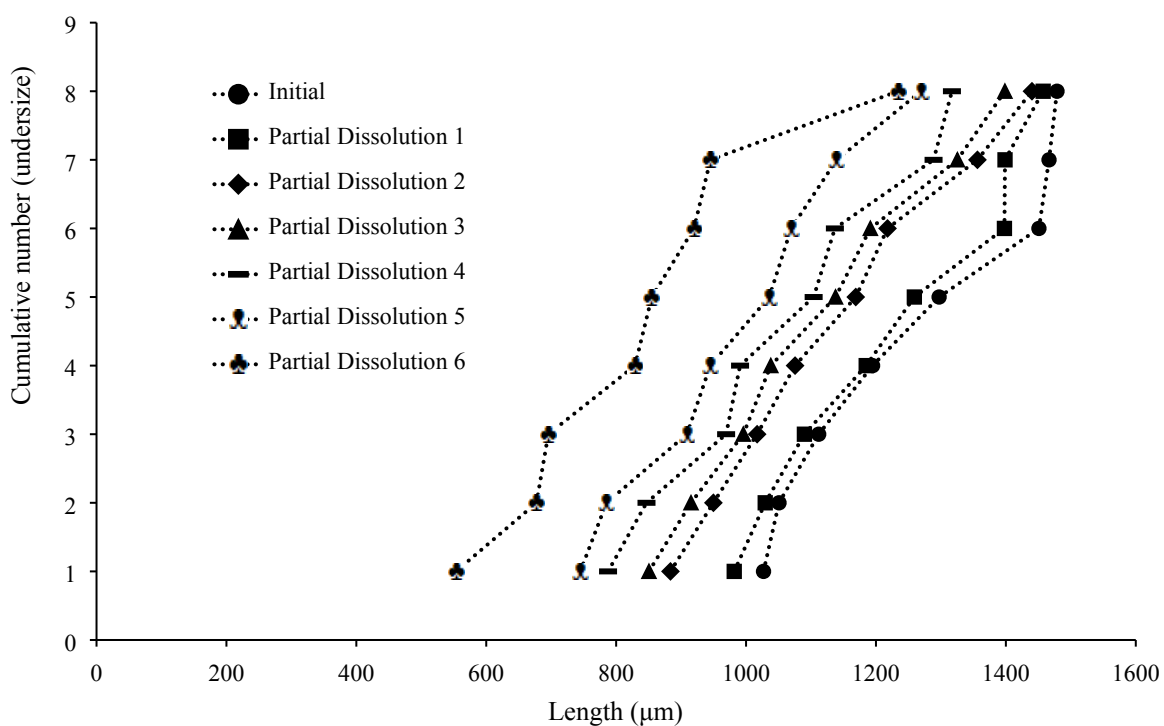

**Figure S19.** Chart comparing particle length versus the ranking of each particle in a partial dissolution series of 1 doped with 1.0 mol % of 3.

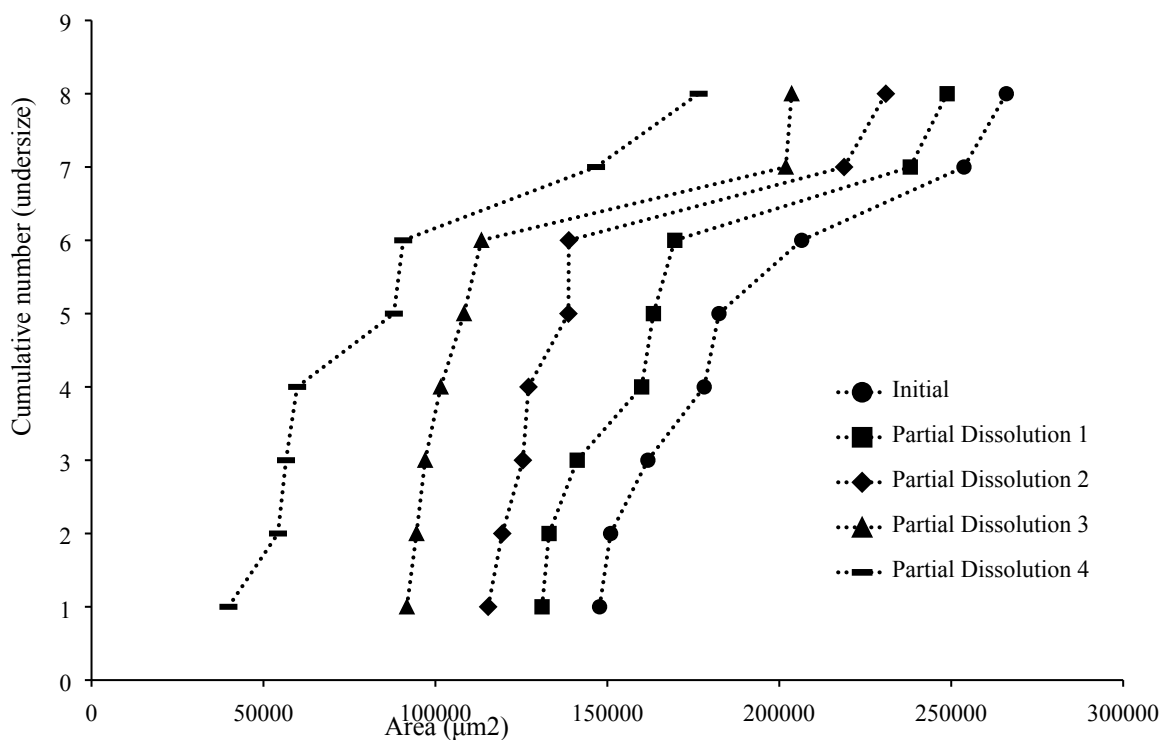

**Figure S20.** Chart comparing particle area versus the ranking of each particle in a partial dissolution series of **1** doped with 1.5 mol % of **3**.

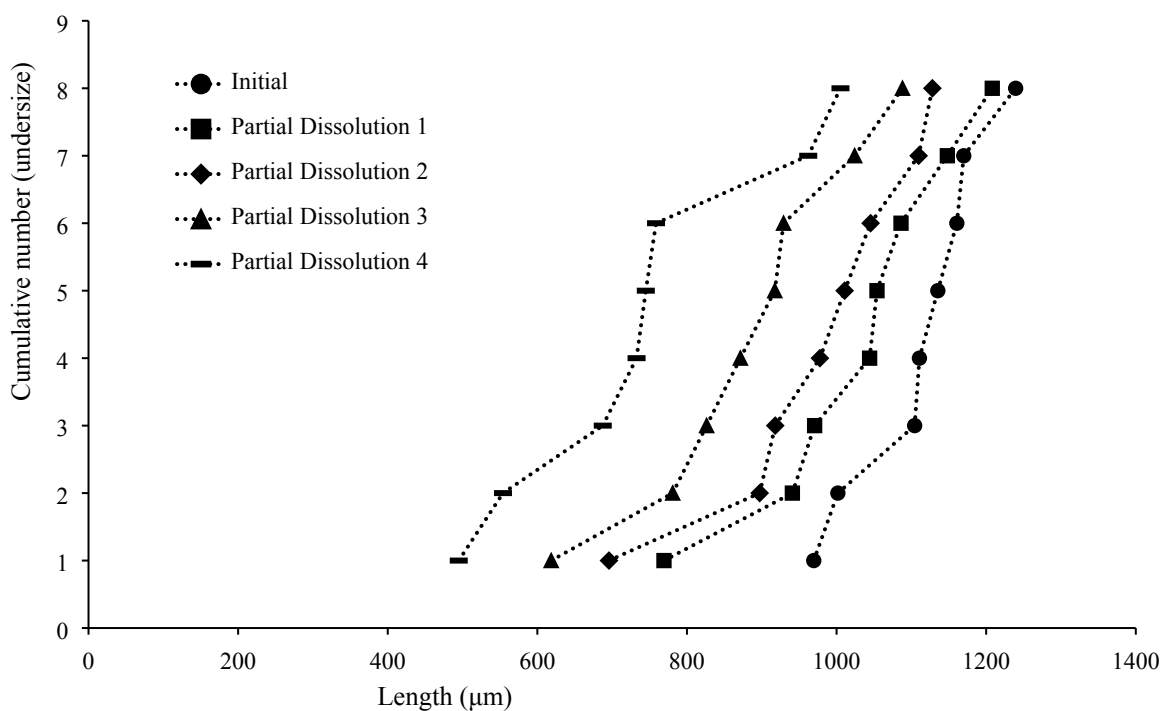

**Figure S21.** Chart comparing particle length versus the ranking of each particle in a partial dissolution series of **1** doped with 1.5 mol % of **3**.

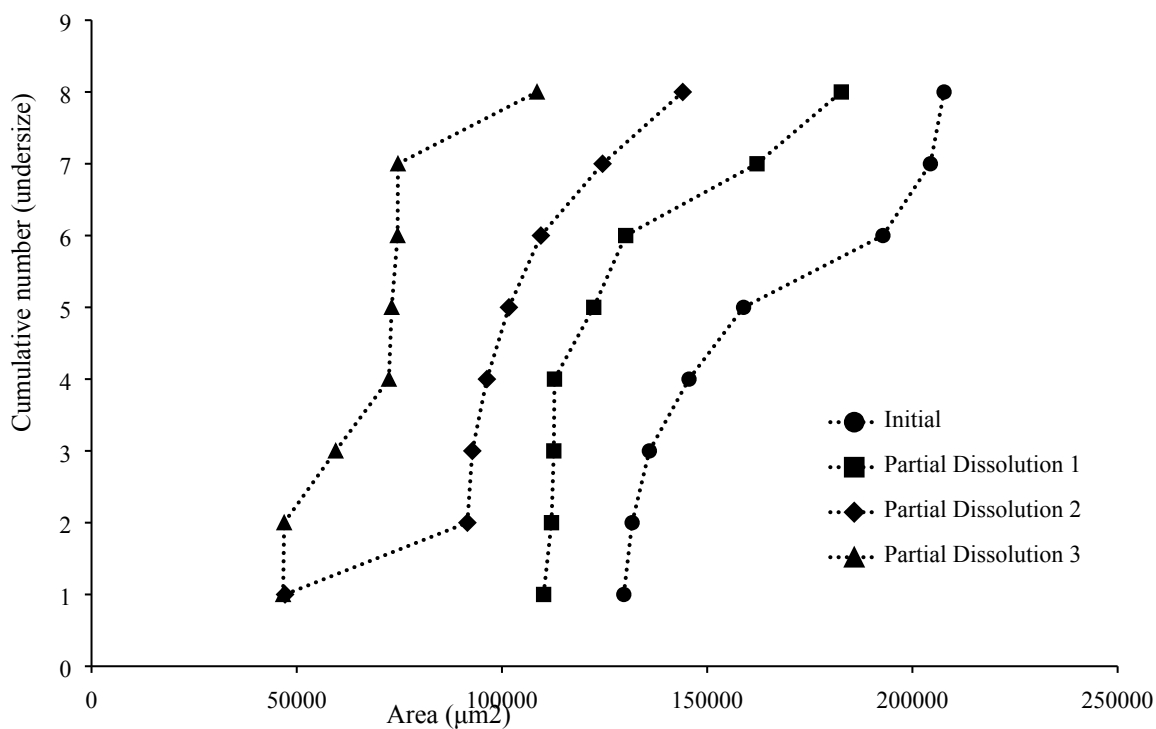

**Figure S22.** Chart comparing particle area versus the ranking of each particle in a partial dissolution series of **1** doped with 2.0 mol % of **3**.

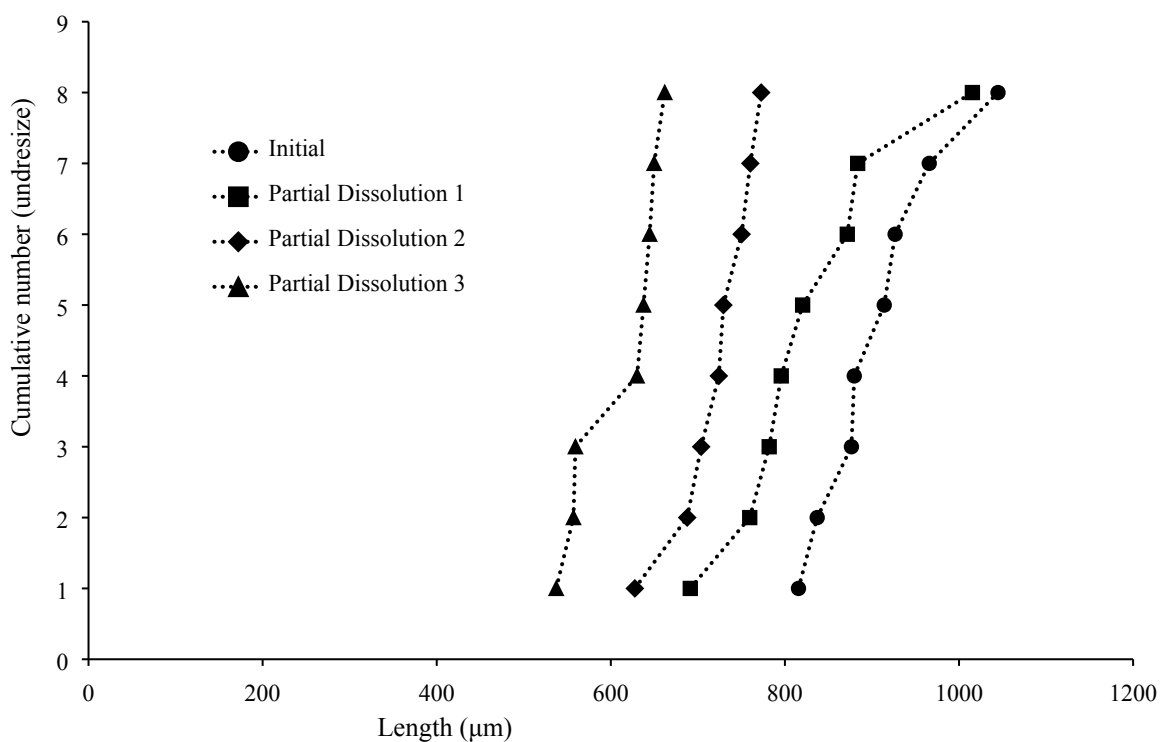

**Figure S23.** Chart comparing particle length versus the ranking of each particle in a partial dissolution series of **1** doped with 2.0 mol % of **3**.

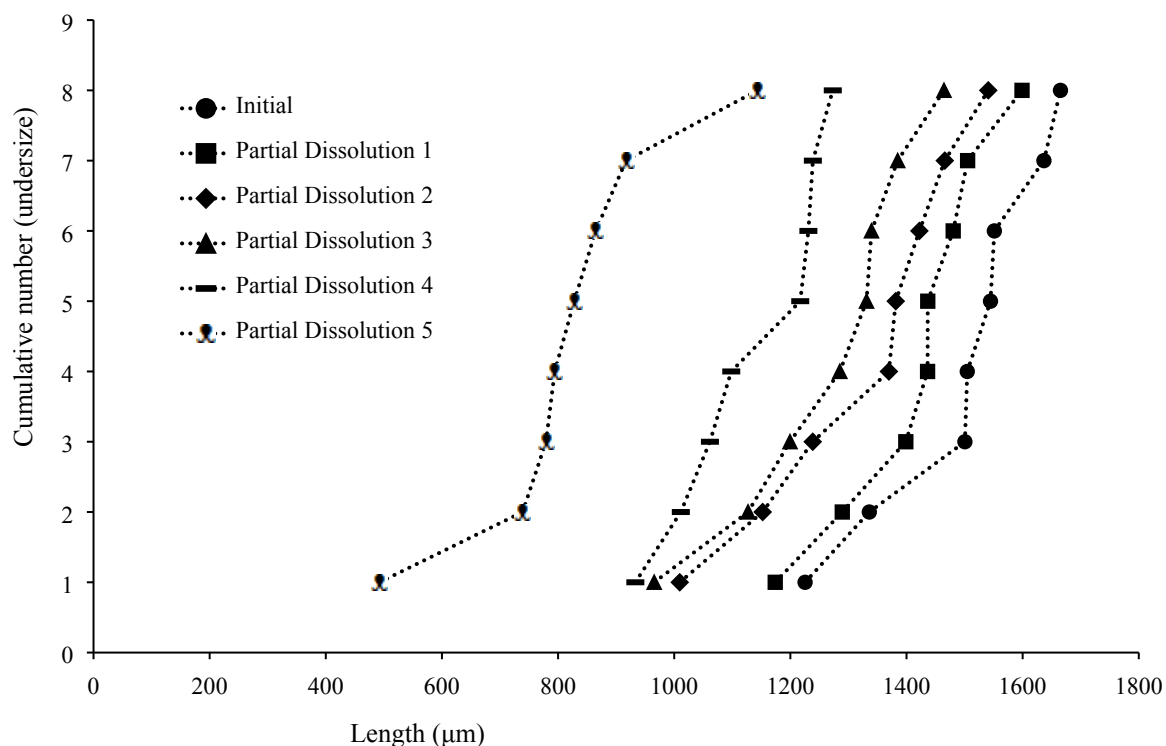

**Figure S24.** Chart comparing particle length versus the ranking of each particle in a partial dissolution series of 1 doped with 2.5 mol % of 3.

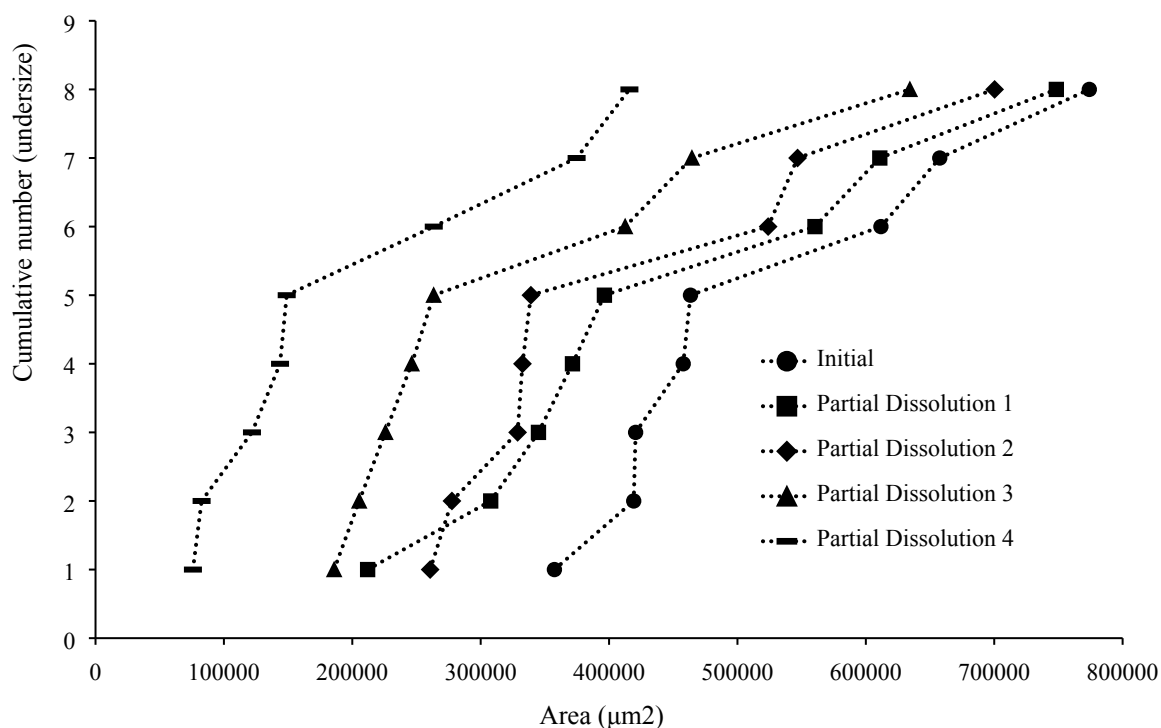

**Figure S25.** Chart comparing particle area versus the ranking of each particle in a partial dissolution series of 1 doped with 3.0 mol % of 3.

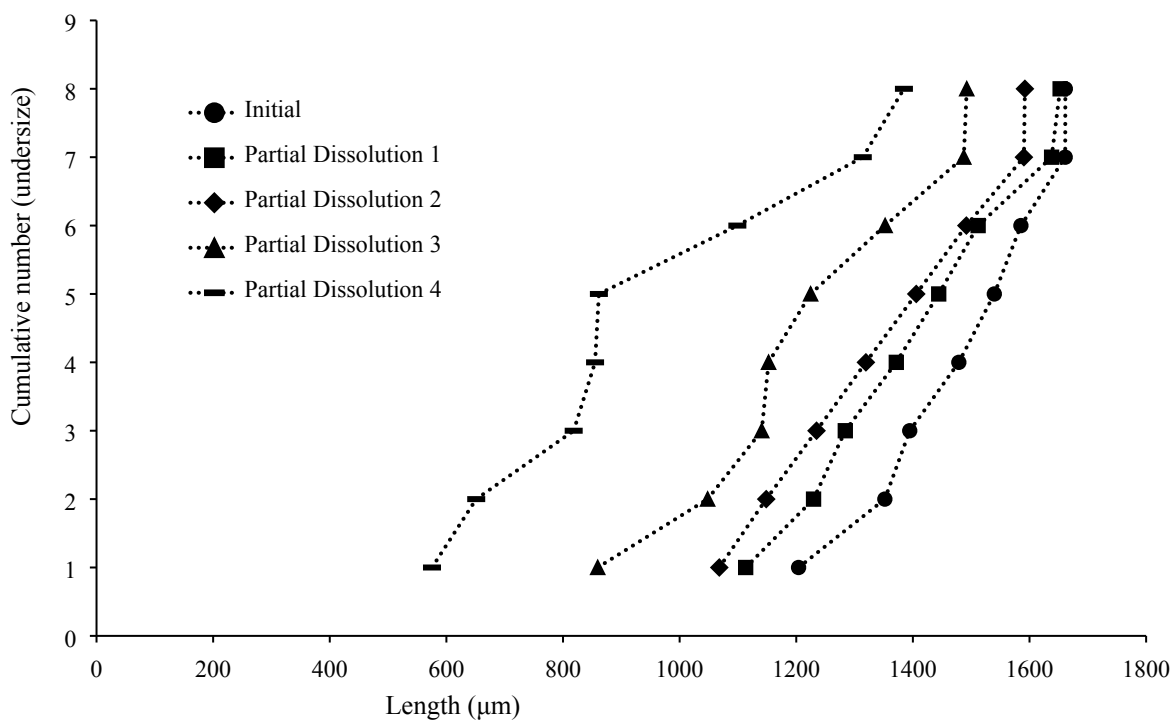

**Figure S26.** Chart comparing particle length versus the ranking of each particle in a partial dissolution series of **1** doped with 3.0 mol % of **3**.

%Impurity vs Dissolution mid-points% for the above

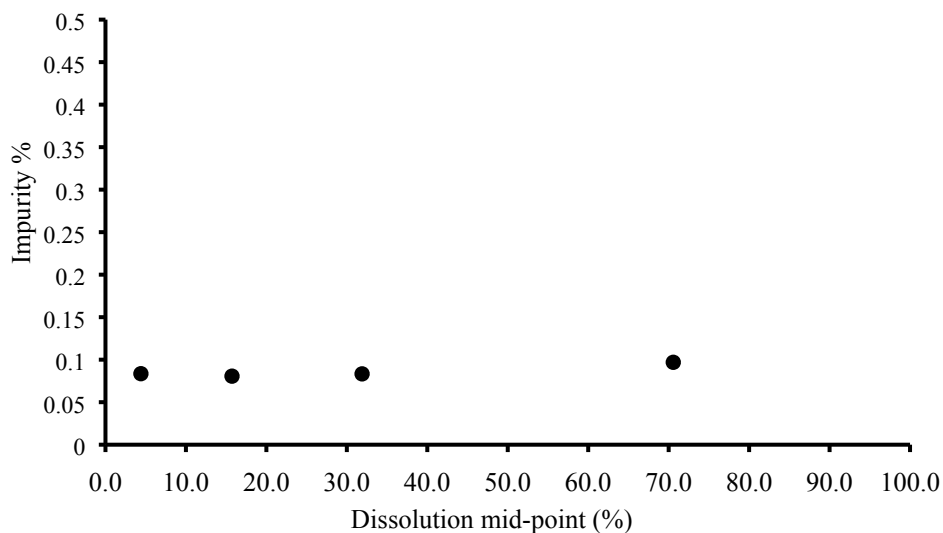

**Figure S27.** Plot of percentage by HPLC of added impurity in crystals of compound **1** vs. the dissolution mid-point for the sample of crystals grown from solutions containing 0.5 mol % of additive **2**.

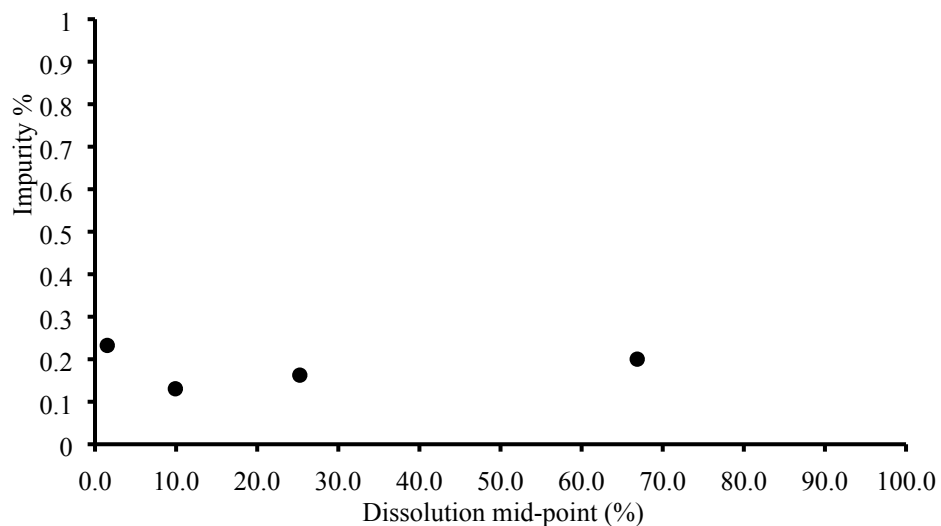

**Figure S28.** Plot of percentage by HPLC of added impurity in crystals of compound **1** vs. the dissolution mid-point for the sample of crystals grown from solutions containing 1.0 mol % of additive **2**.

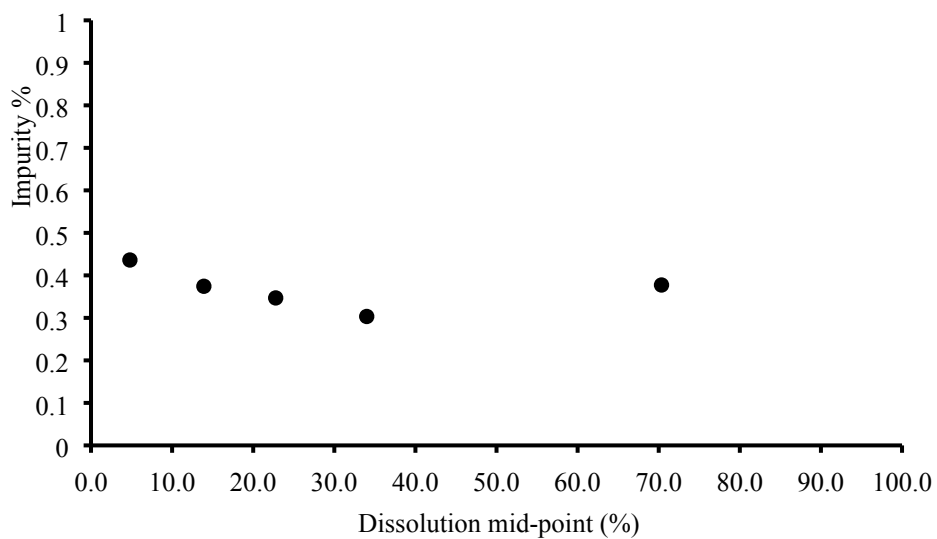

**Figure S29.** Plot of percentage by HPLC of added impurity in crystals of compound **1** vs. the dissolution mid-point for the sample of crystals grown from solutions containing 2.0 mol % of additive **2**.

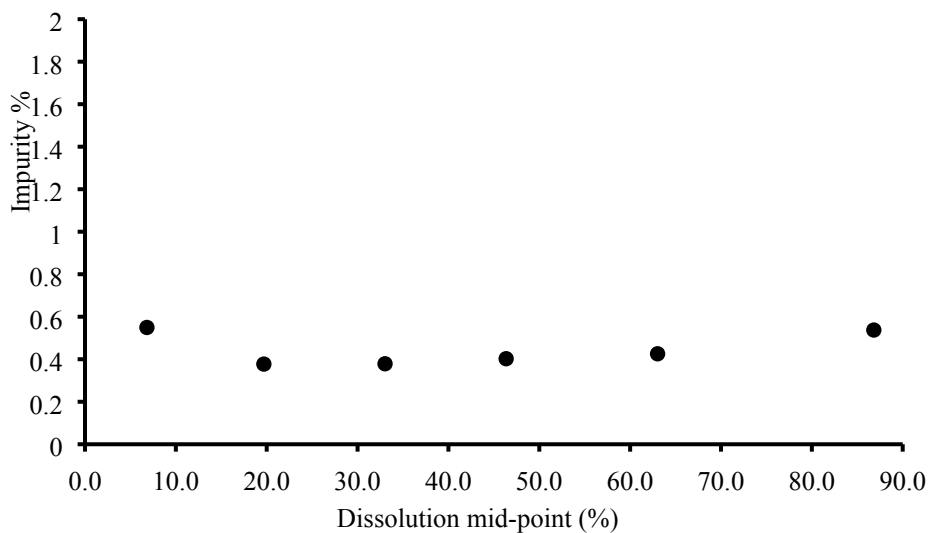

**Figure S30.** Plot of percentage by HPLC of added impurity in crystals of compound **1** vs. the dissolution mid-point for the sample of crystals grown from solutions containing 2.5 mol % of additive **2**.

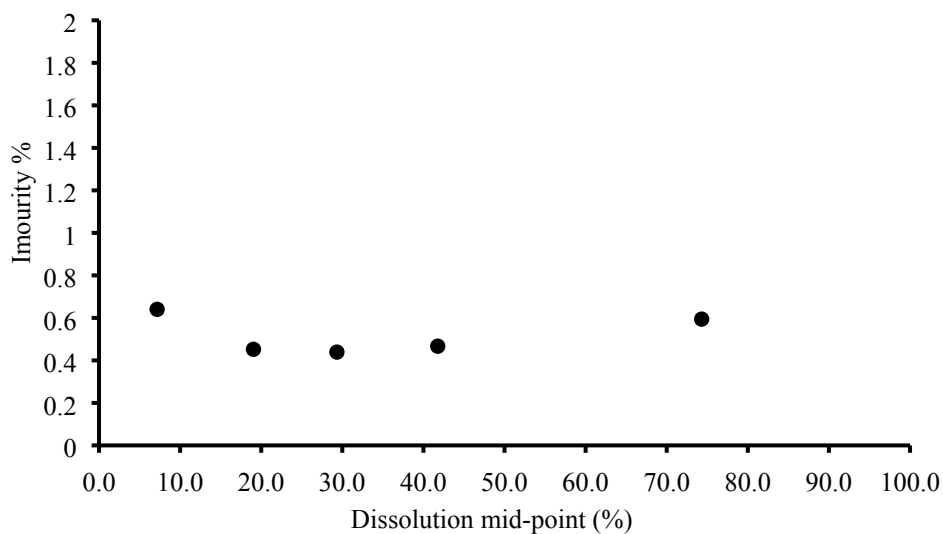

**Figure S31.** Plot of percentage by HPLC of added impurity in crystals of compound **1** vs. the dissolution mid-point for the sample of crystals grown from solutions containing 3.0 mol % of additive **2**.

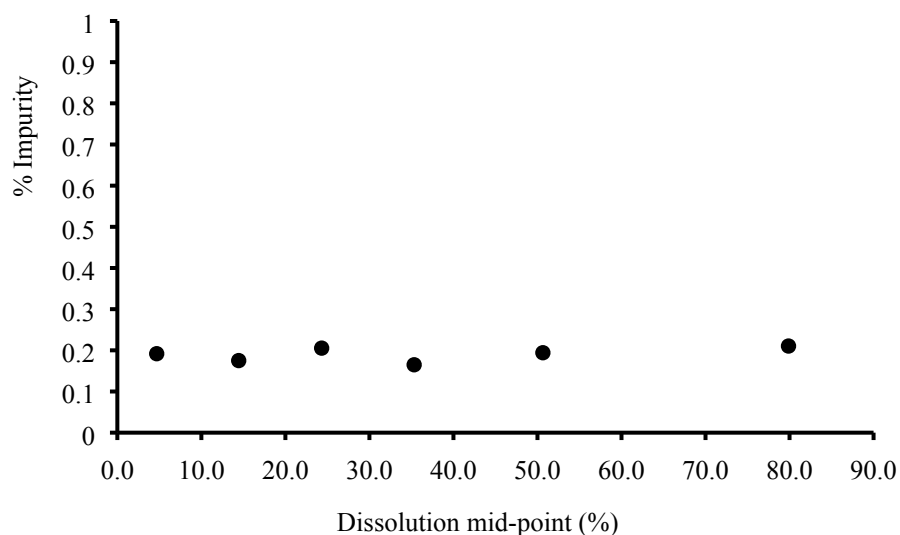

**Figure S32.** Plot of percentage by HPLC of added impurity in crystals of compound **1** vs. the dissolution mid-point for the sample of crystals grown from solutions containing 0.5 mol % of additive **3**.

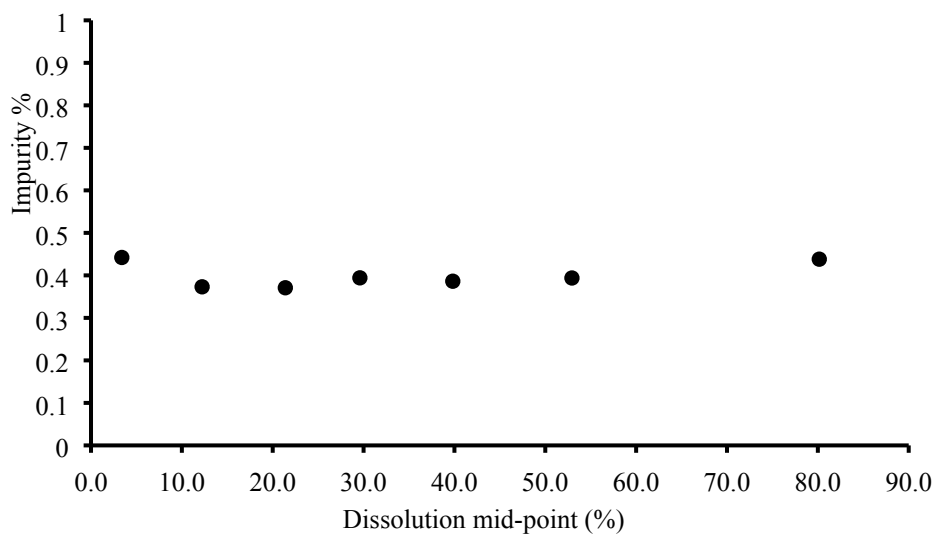

**Figure S33.** Plot of percentage by HPLC of added impurity in crystals of compound **1** vs. the dissolution mid-point for the sample of crystals grown from solutions containing 1.0 mol % of additive **3**.



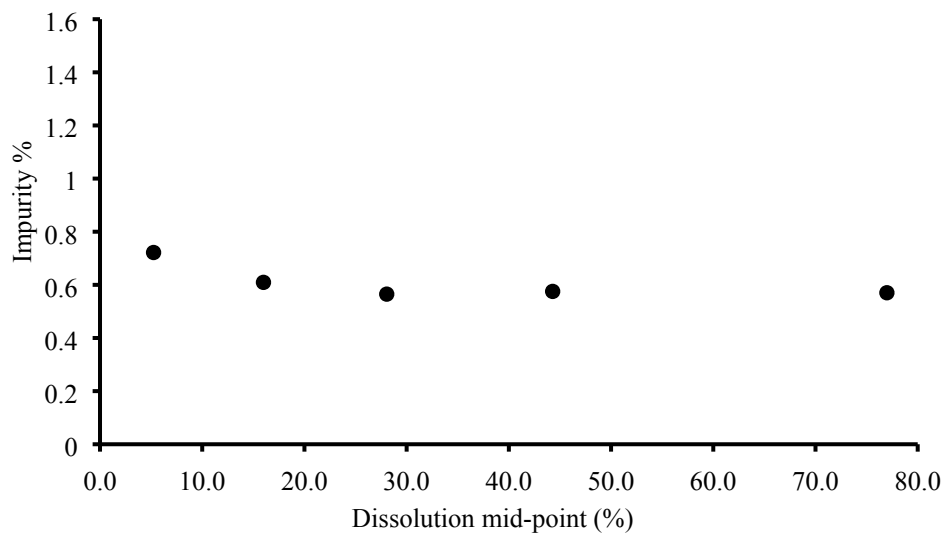

**Figure S34.** Plot of percentage by HPLC of added impurity in crystals of compound **1** vs. the dissolution mid-point for the sample of crystals grown from solutions containing 1.5 mol % of additive **3**.

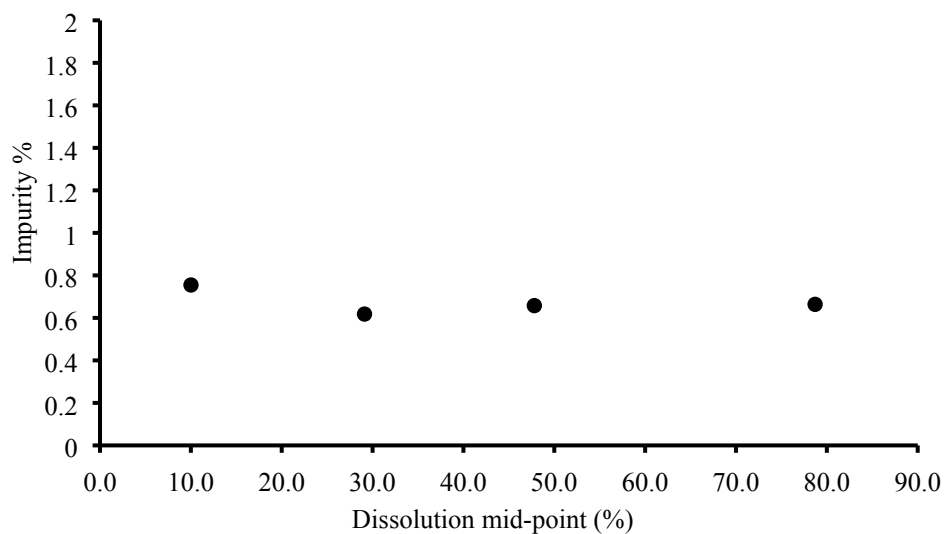

**Figure S35.** Plot of percentage by HPLC of added impurity in crystals of compound **1** vs. the dissolution mid-point for the sample of crystals grown from solutions containing 2.0 mol % of additive **3**.

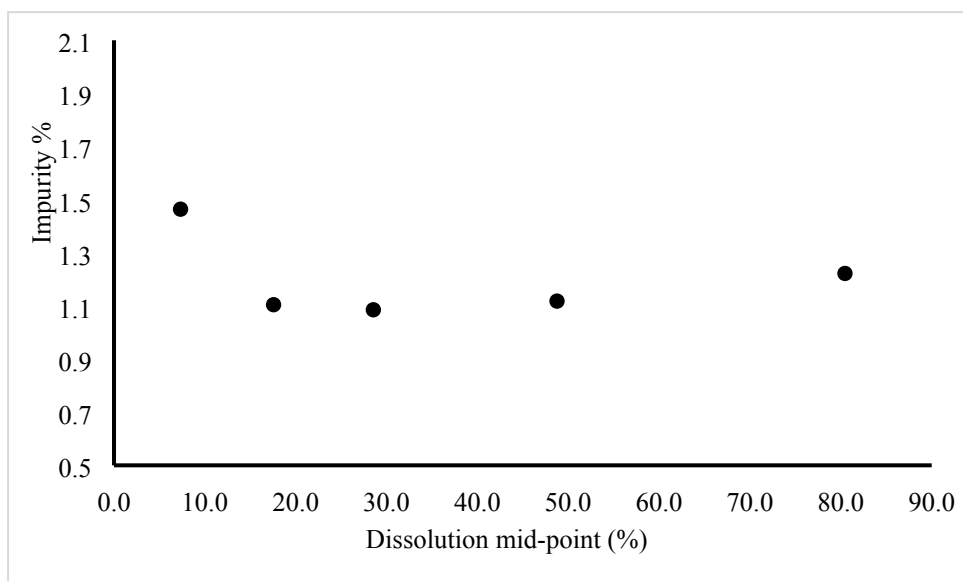

**Figure S36.** Plot of percentage by HPLC of added impurity in crystals of compound **1** vs. the dissolution mid-point for the sample of crystals grown from solutions containing 3.0 mol % of additive **3**.

Data from dissolution of single crystal grown from solution containing 3.0 mol % 3.

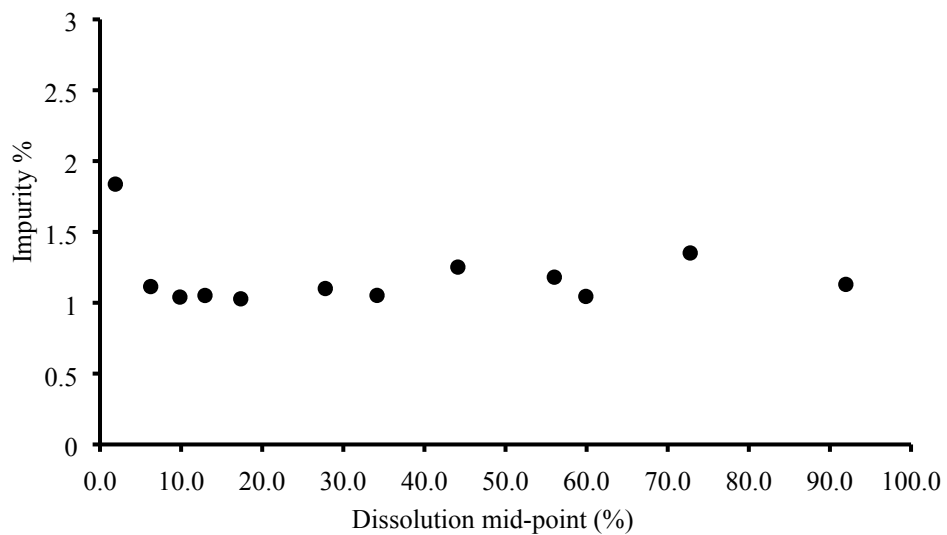

**Figure S37.** Plot of percentage by HPLC of added impurity in a single crystal of compound **1**, grown from solutions containing 3.0 mol % of additive **3**, vs. the dissolution mid-point for the crystal.
